1 Deciphering a marine bone degrading microbiome reveals a complex community effort

2

3 Erik Borchert<sup>a,#</sup>, Antonio García-Moyano<sup>b</sup>, Sergio Sanchez-Carrillo<sup>c</sup>, Thomas G. Dahlgren<sup>b</sup>,

4 Beate M. Slaby<sup>a</sup>, Gro Elin Kjæreng Bjerga<sup>b</sup>, Manuel Ferrer<sup>c</sup>, Sören Franzenburg<sup>d</sup> and Ute

5 Hentschel<sup>a,c</sup>

6

7 <sup>a</sup>GEOMAR Helmholtz Centre for Ocean Research, RD3 Research Unit Marine Symbioses, Kiel,

8 Germany

9 <sup>b</sup>NORCE Norwegian Research Centre, Bergen, Norway

10 <sup>c</sup>CSIC, Institute of Catalysis, Madrid, Spain

11 <sup>d</sup>IKMB, Institute of Clinical Molecular Biology, University of Kiel, Kiel, Germany

12 <sup>e</sup>Christian-Albrechts University of Kiel, Kiel, Germany

13

14 Running Head: Marine bone degrading microbiome

15

16 <sup>#</sup>Address correspondence to Erik Borchert, [eborchert@geomar.de](mailto:eborchert@geomar.de)

17 Abstract word count: 250

18 Text word count: 4926 (excluding Abstract, Importance, Materials and Methods)

19 **Abstract**

20 The marine bone biome is a complex assemblage of macro- and microorganisms, however the  
21 enzymatic repertoire to access bone-derived nutrients remains unknown. The resilient structure  
22 of collagen in bones, its main organic component and its interwoven character with inorganic  
23 hydroxyapatite makes it however difficult to be exploited as an organic resource. To study the  
24 microbial assemblages harnessing organic bone components as nutrients, we conducted field  
25 experiments with the placement of bovine and turkey bones at 69 m depth in a Norwegian fjord  
26 (Byfjorden, Bergen). Metagenomic sequence analysis was used to assess the functional potential  
27 of microbial assemblages from bone surface and the bone eating worm *Osedax mucofloris* that is  
28 a frequent colonizer of whale falls and known to degrade bone. The bone microbiome displayed  
29 a surprising taxonomic diversity and novelty revealed by the examination of 59 high quality  
30 metagenome assembled genomes from at least 23 different bacterial families. Over 700 enzymes  
31 from twelve relevant enzymatic families pertaining to collagenases, peptidases, glycosidases  
32 putatively involved in bone degradation were identified. This study allowed us to decipher the  
33 bone degrading microbiome that initiates demineralization of inorganic bone components by a  
34 closed sulfur biogeochemical cycle between sulfur-oxidizing and sulfur-reducing bacteria  
35 leading to a drop in pH and subsequent processing of organic components. An unusually large  
36 collagen utilization gene cluster was retrieved from one genome belonging to the  $\gamma$ -  
37 proteobacterial genus *Colwellia*. The gene cluster displayed a significant degree of novelty in  
38 comparison to clusters present in closely related *Colwellia* strains, none yet described in detail.

39

40

41 **Importance**

42 In this metagenomic study we decipher the interactions, pathways and enzymes that are  
43 necessary to access and utilize the organic bone matrix in the marine microbial space. Bones are  
44 an underexploited, yet potentially profitable feedstock for biotechnological advances and value  
45 chains, due to the sheer amounts of residues produced by the modern meat and poultry  
46 processing industry. We herein demonstrate the interplay between core community members  
47 from specialist to generalist and present a toolbox of enzymes with the potential to cover an array  
48 of reactions relating to the bone matrix components. We identify and describe a novel gene  
49 cluster for collagen utilization. The bone microbiome is a perfect example of an extraordinarily  
50 complex microbial assemblage, that is only able to function and survive due to the interplay  
51 between the different community members across taxonomic borders.

52

## 53 **Introduction**

54 The marine environment is a treasure trove for novel microbial assemblages, organic catalyts  
55 (enzymes) and biochemical reactions biocatalysts (1-3). The oceans cover approximately 70% of  
56 the Earth surface with an estimated volume of about  $2 \times 10^{18} \text{ m}^3$  and due to its incredible  
57 environmental variability (e.g. temperature, pressure, salinity, light availability), it has sparked  
58 the evolution of an unprecedented range of different microbes and hence enzymatic activities (4-  
59 7). Genome sequencing of individual microbial isolates of complex communities has allowed us  
60 to get a glimpse of their diversity and their potential functions. The underrepresentation of  
61 cultivable microbes has advanced functional and sequence-driven metagenomic analyses, and  
62 enabled us to decipher complex interactions in entire microbial consortia (8-13).

63 The deep-sea was for a long time seen as an almost lifeless environment, as no one could  
64 imagine life to be possible under conditions vastly different and more extreme than those in  
65 shallower ocean waters. Nowadays we know that even the deep-sea is steaming with life;  
66 hydrothermal vents, sponge grounds and coral gardens are superb examples of unique and  
67 complex habitats (14-16). Nonetheless, the deep-sea is a harsh environment with limited nutrient  
68 sources. In this respect sudden events like a whale fall create a locally defined, but huge nutrition  
69 source for deep-sea life, that can last for many years or even decades (17). These whale carcasses  
70 are usually stripped of their soft tissue rapidly by larger scavengers, but the energy-rich bones  
71 remain as a slow nutrient source. More than 15 years ago *Osedax* was described, a genus of  
72 bone-eating annelid worms (18), and has since then been investigated for its diversity, ecology  
73 and how it accesses the organic compounds of whale bones (18-21). These worms bore cavities  
74 into bones and are known to harbor endosymbionts in their root tissue typically affiliated to  
75 Oceanospirillales (18, 22-25). In the study area in the northern North Atlantic *Osedax mucofloris*

76 was described in 2005 and has been shown to consistently colonize bone material on the sea  
77 floor below a depth of 30 m (26-28). The species can thus be regarded as a member of the bone  
78 biome and an important facilitator in this degradation process.

79 Bone is a recalcitrant and heterogeneous composite material made of a mineral phase, an organic  
80 phase and water. Hydroxyapatite crystals in the mineral phase contribute to the structural  
81 strength in bones. The organic phase includes proteins, such as collagen and structural  
82 glycoproteins (e.g. proteins decorated with mannose, galactose, glucosamine, galactosamine, N-  
83 acetylglucosamine, N-acetylgalactosamine, rhamnose, sialic acid and fucose), lipids and  
84 cholesterol composed of various triglycerides (29-31). Up to 90% of the protein content in  
85 mature bone is made of type I collagen, a triple helical molecule rich in glycine, hydroxyproline  
86 and proline that acquires organization into fibrils with a high degree of hydrogen bonds,  
87 hydrophobic interactions and covalent cross-linking, which together confer high structural  
88 stability to collagen fibrils (32). It is thus hypothesized that degradation of the recalcitrant bone  
89 matrix will require a synergistic multi-enzyme system that likely requires a microbial community  
90 effort. This will likely include essential enzymes in the breakdown of the organic matrix, namely  
91 collagenases that break the peptide bonds in collagen and other proteases/peptidases that attack  
92 the glycoproteins. Furthermore, neuraminidases (sialidases),  $\alpha$ -mannosidases,  $\alpha$ -/ $\beta$ -  
93 galactosidases,  $\alpha$ -fucosidase,  $\alpha$ -rhamnosidase and  $\alpha$ / $\beta$ -N-acetylhexosaminidase (glucose and  
94 galactose-like), all glycoside hydrolase enzymes (COG0383, COG1472, COG3250, COG3669,  
95 COG4409, Pfam16499, Pfam16499), are likely involved in cleavage of glycosidic linkages.  
96 Finally, in the digestion of the cholesterol-containing marrow, cholesterol oxidases (COG2303)  
97 are probably involved.

98 To date only a few studies have been published that focus on microbial communities to  
99 understand the necessary complex interactions in bone degradation, mainly relying on 16S rRNA  
100 gene sequencing data (33, 34) and one metagenomic study of a whale fall (35). We here provide  
101 a first comprehensive overview and identify putative key functions involved in bone degradation  
102 of the marine bone microbiome retrieved from deployed bone material, including microbial  
103 communities from the gutless worm *Osedax mucofloris* and free living microbial assemblages  
104 developing on the bone surface.

105

106

107

108

109

110

111

112

113

114

115

116

## 117 **Results**

### 118 **Recovery of artificially deployed bone for bone microbiome metagenomic analysis**

119 To collect relevant bacterial communities, turkey and bovine bones were deployed at 69 m  
120 depths in Byfjorden, a fjord outside Bergen, Norway. After several months of incubation,  
121 underwater images taken by a remotely operated vehicle (ROV) showed microbial colonization  
122 of the bone surfaces (supplementary figure S1A). *Osedax mucofloris* worms were observed,  
123 especially on the joints, and in some cases forming small colonies of several individuals inside a  
124 single cavity under the external bone tissue. Although not object of this study, a larger diversity  
125 of invertebrate fauna including *Ophryotrocha*, *Vigtorniella* and *Capitella* worms were also  
126 observed. Dense microbial mats developed asymmetrically with preference for the joint adjacent  
127 sections (epiphysis), which also appeared in aquaria settings (supplementary figure S1B).

128 Two different sets of samples were collected and subjected to metagenome sequencing. The two  
129 sets of metagenomes are an *Osedax*-associated bone microbiome (OB), and a bone surface  
130 associated biofilm (BB), each consisting of four individual metagenomes (Table 1). Eight  
131 individually sequenced metagenomes generated a raw output of approximately 211 mio reads  
132 (per direction) yielding a combined assembly of 1.5 Gbp. According to Small Subunit (SSU)  
133 rRNA gene abundance calculations, a large fraction (>75%) of the *Osedax*-associated SSU  
134 rRNA gene reads accounts for *Osedax* (18S), while the BB metagenome contains less than 5% of  
135 eukaryotic SSU rRNA gene affiliated reads. The microbial communities were dominated by four  
136 different bacterial classes, these being Campylobacteria (35% in OB, 20% in BB),  
137 Desulfobacteria (5,8% in OB, 12,8% in BB),  $\gamma$ -proteobacteria (26,9% in OB, 1,9% in BB) and  
138 Bacteroidia (14,3% in OB, 5,5% in BB) although in different proportions (Figure S2B). The OB

139 metagenome is less diverse than the BB metagenome, with the diversity estimate Chao1 ranging  
140 from 286 Operational Taxonomic Units (OTUs) to 566 OTUs respectively (Figure S2A) based  
141 on all obtained SSU rRNA gene reads. The bacterial fraction of the OB metagenome consists to  
142 approximately 27% of Oceanospirillales affiliated reads, which likely represent *Osedax*  
143 endosymbionts (22).

144 **High quality metagenome assembled genomes (MAGs) from the marine bone**  
145 **microbiome display taxonomic diversity and novelty**

146 59 high quality MAGs (>90% completion and <10% redundancy) were extracted from the  
147 combined metagenomes (see supplementary Table S1 for MAG sequence statistics). The MAGs  
148 span 11 phyla, 14 classes, 19 orders and at least 23 families. About 63% of the MAGs (37/59)  
149 possess a taxonomic novelty determined by their relative evolutionary divergence (RED)  
150 according to Parks *et al.* (2018) (36) to their closest common ancestor (Table 2). One MAG  
151 could be only identified up to phylum level, seven to class level, seven to order level, 18 up to  
152 family level and four up to genus level (Figure 1). The taxonomy of most MAGs was fully  
153 resolved based on 120 marker genes. The three best represented phyla are Proteobacteria (22  
154 MAGs), Campylobacterota (14 MAGs) and Bacteroidota (8 MAGs), which is consistent with the  
155 relative abundances of the metagenomic sequence reads and the 16S RNA gene profiling (Figure  
156 S2). However, the percental distribution of the most abundant classes differs considerably  
157 between the two metagenome sets. The OB-MAGs were dominated by the classes  $\gamma$ -  
158 proteobacteria (27%), Campylobacteria (27%) and  $\alpha$ -proteobacteria (20%), while the BB-MAGs  
159 were mainly affiliated with  $\gamma$ -proteobacteria (30%), Campylobacteria (23%) and Bacteroidia  
160 (16%).



## 161 Primary metabolism of the marine bone microbiome

162 All MAGs were investigated using Multigenomic Entropy Based Score pipeline (MEBS) (37) for  
163 their ability to utilize different energy sources (sulfur and nitrogen) via the abundance of selected  
164 marker genes for these pathways (Figure 2). MAGs affiliated to the order Campylobacterales  
165 (BB9, BB14, BB41 – Sulfurovaceae; BB10, BB26 – Thiovolaceae; OB7, BB28, BB30 –  
166 Arcobactereaceae; OB11, BB15 - *Sulfurospirillum* and OB8, OB5, BB11 - *Sulfurimonas*), some  
167 unclassified  $\gamma$ -proteobacteria (OB6, BB34, BB36 and BB4) and the  $\gamma$ -proteobacteria affiliated to  
168 Beggiatoaceae (BB2, BB3, BB16, BB20 and BB31) are all potentially capable of thiotrophy via  
169 utilization of reduced sulfur compounds as electron donors (flavocytochrome c sulfide  
170 dehydrogenase (*fccB*) and adenosine-5'-phospho-sulfate reductase (*aprAB*)) and partial  
171 predicted Sox sulfur/thiosulfate oxidation pathway. Additionally, the Campylobacterales MAGs  
172 also contain marker genes for the oxidation of sulfite to sulfate via the Sor pathway. MAGs  
173 identified as Desulfuromusa (BB21, BB25), Desulfobacteria (BB40 and OB14), Desulfobulbia  
174 (BB13) and Desulfovibrionia (OB3) presented the marker genes for dissimilatory sulfite  
175 reductase system (*dsrKMJOP*) (also found in the Beggiatoaceae and unclassified  $\gamma$ -  
176 proteobacteria MAGs), but they lack Sox and Sor pathway genes. In all  $\gamma$ -proteobacteria (except  
177 BB32) and Desulfobacterota (BB13, BB40, OB3 and OB14) genes for dissimilatory sulfite  
178 reductase (*dsrABC*) are present. Müller *et al.* (2015) described that  $\gamma$ -proteobacterial *dsrAB*-type  
179 genes are commonly involved in oxidative reactions, whereas *dsrAB* in Desulfobacterota are  
180 reductive type *dsrAB* (38). All MAGs contain at least partial pathways for dissimilatory  
181 tetrathionate reduction (*ttrABC*), thiosulfate disproportionation (*phsABC* and rhodanase) and  
182 contain also genes for sulfoacetaldehyde degradation (*isfD*, *xsc* and *safD*), nitrate reduction

183 (assimilatory and dissimilatory), methylamine degradation, sulfolactate degradation, and  
184 ammonia assimilation (ammonia assimilation I and superpathway ammonia assimilation).

185 With respect to microbial bone degradation, the features of gelatin hydrolysis and H<sub>2</sub>S  
186 production (desulfurylation) were additionally of interest and were investigated using Traitar  
187 (39), which provides genome-informed phenotype predictions. 22 MAGs showed capacity of  
188 gelatin hydrolysis (19 MAGs in the bone surface community (BB) and three in the *Osedax*  
189 associated communities (OB)) and 10 MAGs for H<sub>2</sub>S production (six MAGs in BB and three in  
190 OB). Traitar's prediction for gelatin hydrolysis is based on the presence of 70 and the absence of  
191 51 other Pfam families. With gelatin being a primarily bone collagen derived compound, we  
192 consider gelatin hydrolysis a key trait for the microbial community studied herein. All eight  
193 Bacteroidia affiliated MAGs (BB17, B22, BB23, BB24, BB29, BB35, BB42 and OB13) possess  
194 the gelatin hydrolysis trait, seven  $\gamma$ -proteobacteria MAGs (BB2, BB3, BB5, BB20, BB32, BB44  
195 and OB12), one tentative Planctomycetota MAG (BB1), one Spirochaetia MAG (BB7), two  
196 Krumholzibacteria MAGs (BB18 and BB39), one Thiovulaceae (BB26), one  
197 Geopsychrobacteraceae (BB27) and one Fermentibacteria MAG (BB12) (Figure 3). The  
198 prediction of the H<sub>2</sub>S production trait in Traitar is based on the presence of 43 Pfam families and  
199 absence of 22 Pfam families. This trait was identified in 10 MAGs, two of which were  
200 Marinifilaceae (OB13 and BB29), two Krumholzibacteria (BB18 and BB39), two  
201 *Sulfurospirillum* (OB11 and BB15), one Spirochaetaceae (BB7), two Desulfobacteraceae (OB14  
202 and BB40), and one *Pseudodesulfovibrio* (OB3).

203 **Accessing the recalcitrant bone material by acid-based solubilization**

204 To identify mechanisms key to utilize the resilient bone as a nutrient source, the MAGs were  
205 screened for marker genes for enzymatic functions beneficial for bone degradation. In this  
206 respect, enzymes catalyzing reactions leading to an acidification of the local environment could  
207 be important to increase the solubilization of hydroxyapatite and thereby making the bone's  
208 organic matrix more accessible to microbial colonization and enzymatic attack. The obtained  
209 bacterial genomes were therefore screened for lactate dehydrogenase (*ldh*), carbonic anhydrase  
210 and P-type ATPase. Altogether the MAGs contained 35 annotated lactate dehydrogenases, 191  
211 P-type proton ATPases (H<sup>+</sup>-ATPase) and 94 carbonic anhydrases (supplementary table S2).  
212 Three lactate dehydrogenases per genome were found in the  $\alpha$ -proteobacterial MAGs OB15,  
213 OB9 and BB33. Five MAGs (BB6, BB20, BB38, BB42, OB14) contained two lactate  
214 dehydrogenases, whereas 16 MAGs contained one lactate dehydrogenase (BB1, BB3, BB5, BB9,  
215 BB17, BB18, BB22, BB26, BB29, BB35, BB37, BB40, OB1, OB3, OB8, OB14). The identified  
216 lactate dehydrogenases were investigated for the presence of signal peptides to be secreted to the  
217 extracellular matrix, but none contained such a signal and therefore do most likely not play a  
218 prominent role in acidification. Plasma membrane H<sup>+</sup>-ATPases are found in elevated levels  
219 (>10) solely in unclassified  $\gamma$ -proteobacteria (BB4, BB34 and BB36) and Beggiatoales affiliated  
220 MAGs (BB3, BB16 and BB20), all from the surface attached microbial communities. Only five  
221 MAGs are devoid of P-Type ATPases, being BB12 (Fermentibacteriaceae), BB27  
222 (Geopsychrobacteriaceae), OB13 (*Labilibaculum*) BB18 and BB39 (both Krumholzibacteria).  
223 Carbonic anhydrases were identified in 51 of 59 MAGs. Nineteen out of 94 carbonic anhydrases  
224 contained a signal peptide for extracellular export (16 MAGs). 15 were predicted to contain a  
225 Sec signal peptide (SPI) and four to encode lipoprotein (SPII) signal peptides. Four out of five  
226 Beggiatoales MAGs were predicted to contain carbonic anhydrases with a SPI signal peptide

227 (BB2, BB3 and BB20) or a SPII signal peptide (BB16). The remaining three SPII signal peptides  
228 were found in carbonic anhydrases from Campylobacterales (BB8, BB10 and BB11),  
229 interestingly BB8 contains at least three carbonic anhydrases, one with a SPI, one with a SPII  
230 and one without signal peptide. Three SPI signal peptides were found in carbonic anhydrases  
231 from unclassified  $\gamma$ -proteobacteria (BB4, BB34 and BB36) mentioned previously alongside  
232 Beggiatoales with elevated P-type ATPase levels. The remaining SPI including carbonic  
233 anhydrases were found in five Campylobacterales MAGs (BB14, BB26 (three carbonic  
234 anhydrases and two containing SPI signal peptides), BB30, BB41 and OB7) and one  
235 Desulfobulbaceae MAG (BB13). 18 out of 19 carbonic anhydrases belong to the  $\alpha$ -carbonic  
236 anhydrase family and one to the  $\beta$ -family, no  $\gamma$ -family carbonic anhydrases were found, based on  
237 phylogenetic relationship to known carbonic anhydrases of each family, reference sequences  
238 described in Capasso *et al.*, 2015 have been used (40) (Supplementary figure S3).

239 The anticipated thiotrophy has the potential to contribute massively to the acidification of the  
240 environment via the oxidation of reduced sulfur compounds leading to production of sulfuric  
241 acid (41). This requires a close interaction between sulfur-reducing bacteria (SRB) producing  
242 hydrogen sulfide and sulfur-oxidizing bacteria (SOB) utilizing the hydrogen sulfide, while  
243 releasing protons (Figure 3). The Traitair analysis identified 10 MAGs potentially able to produce  
244 hydrogen sulfide, including known SRB like Desulfobacteraceae, Pseudodesulfobivrio, and  
245 others like *Sulfurospirillum* (42-44). The bone microbiome is especially enriched in known SOB,  
246 like the large filamentous bacteria Beggiatoales (5 MAGs) (45) and Campylobacterales (10  
247 MAGs) (46, 47). Furthermore, one MAG identified as Desulfobulbaceae was found in the bone  
248 associated metagenomes. These cable bacteria are known to be able to perform sulfur oxidation  
249 and sulfur reduction (48, 49).

## 250 **Enzymatic profiling for enzymes involved in bone degradation**

251 Based on the structure and composition of mature vertebrate bone tissue, we hypothesized that  
252 12 different COGs and peptidase/collagenase families were relevant for the enzymatic attack of  
253 the bone organic matrix. This “bone-degradome” comprised the peptidase families S1  
254 (COG0265), S8/S53 (and Pfam00082), U32 (COG0826) and M9 collagenase (including  
255 Pfam01752), mannosidases (COG0383), sialidases (COG4409), glucuronidases (COG3250),  
256 glucosaminidases (COG1472), galactosaminidases (COG0673),  $\alpha$ -galactosidases (Pfam16499),  
257 cholesterol oxidases (COG2303) and fucosidases (COG3669). We constructed HMM profiles  
258 that were used to screen the abundance of each enzyme family in all MAGs (Figure 4). In total  
259 722 enzymes belonging to the 12 investigated enzyme families were identified in the 59 MAGs.  
260 Most enzyme families were widespread (except COG0383, COG3669, COG4409, Pfam16499  
261 and M9 collagenases). M9 collagenases and  $\alpha$ -galactosidases (Pfam16499) were only found in  
262 three MAGs. The M9 collagenases were solely found in Enterobacterales (BB5, BB44 and  
263 OB12). Pfam16499 was only identified in Bacteroidales (BB22, BB24 and OB13). The most  
264 abundant group of enzymes were the S1 peptidases (141 hits), followed by galactosaminidases  
265 (COG0673) (116 hits) and U32 peptidases (99 hits) (Figure 4), constituting 20%, 16% and 14%  
266 of all identified bone degrading enzymes, respectively. In general, Bacteroidales (BB17, BB22,  
267 BB24, BB29, BB42 and OB13) displayed the most diverse set of enzyme families related to  
268 bone degradation, as they contained genomic evidence of all enzymes besides M9 collagenases.  
269 MAGs belonging to the orders Desulfuromonadia, Desulfobulbia, Desulfobacteria,  
270 Desulfovibrio, Campylobacteria (all of them driving the sulfur biogeochemical cycle), as well as  
271 some undefined  $\alpha$ -proteobacteria and  $\gamma$ -proteobacteria appear to have no or few mannosidases

272 (COG0383), glucuronidases (COG3250), fucosidases (COG3669), sialidases (COG4409) and  $\alpha$ -  
273 galactosidases (Pfam16499).

#### 274 ***Colwellia*, the potential degrader of collagen**

275 We investigated the genomic context of each M9 collagenase for potential links to metabolic  
276 pathways, such as proline utilization (Supplementary figure S4). *Colwellia* MAG BB5 possessed  
277 an approximately 21 kbp-long gene cluster presumably devoted to collagen utilization, which is  
278 unique in the dataset and in the public databases. The functional cluster spans at least 15  
279 different genes (Figure 5A), featuring a secreted Zn-dependent M9 collagenase, a secreted  
280 peptidyl-prolyl cis-trans isomerase (cyclophilin-type PPIase), a secreted unknown protein and an  
281 unknown Zn/Fe chelating domain-containing protein. Additionally, one putative transporter  
282 (MFS family), a TonB-dependent receptor and several genes involved in the catabolism of  
283 proline and hydroxyproline e.g. prolyl-aminopeptidase YpdF, intracellular peptidyl-prolyl cis-  
284 trans isomerase (rotamase), pyrroline reductase, hydroxyproline dipeptidase, 4-hydroxyproline  
285 epimerase and others. Moreover, genes involved in transcription regulation such as PutR and the  
286 stringent starvation protein A and B were identified.

287 To explore the conservation of this gene cluster, we retrieved fourteen representative *Colwellia*  
288 genomes of marine origin from the NCBI repository (Supplementary table S3). To minimize  
289 methodological bias, the nucleotide sequences of these genomes were likewise annotated with  
290 RAST (Rapid Annotation using Subsystem Technology) and screened for M9 collagenase using  
291 the previously established HMM profile. Up to 22 annotated M9 collagenases were identified in  
292 the seven genomes. In the genomes of *Colwellia piezophila* ATCC BAA-637 and *Colwellia*  
293 *psychrerythraea* GAB14E a gene cluster comparable to the one in MAG BB5 was identified

294 (Figure 6) and found to be largely conserved between the two species. BB5 additionally contains  
295 several other relevant genes, such as PutR regulator, stringent starvation proteins A and B, TonB  
296 dependent receptor, Zn/Fe binding domain protein, 1-pyrroline-4-hydroxy-2-carboxylate  
297 deaminase (dAminase) and a peptidyl-prolyl cis-trans isomerase PpiD (Rotamase).

298

299

## 300 **Discussion**

301 In this study, 59 high quality MAGs were reconstructed from microbes colonizing bone surface  
302 biofilms and from symbionts of the bone-eating worm *Osedax mucofloris*. Metabolic  
303 reconstruction revealed a complex, diverse and specialized community. Despite the differences  
304 in the bone material composition and structure between vertebrates (50), the major bacterial  
305 community compositions detected herein are in line with previously reported results using SSU  
306 rRNA gene profiling (33, 34). Our MAGs span at least 23 bacterial families and uncover a large  
307 potential for taxonomic novelty (over 50% according to genome-based taxonomy) from species  
308 up to class level in the bone microbiome. Interestingly, only genomes of gram-negative bacteria  
309 were reconstructed and despite gram-positive bacteria being widespread in the marine  
310 environment, they make up only minor portions of the metagenomes (1-1.2% of the reads  
311 affiliated to Firmicutes, Supplementary figure S1) (51). Moreover, they are known to carry out  
312 potentially relevant metabolic processes (thiotrophy, sulfidogenesis) (52, 53), are also capable of  
313 dealing with low pH conditions which are likely encountered during bone dissolution (54), and  
314 they possess high capacity for the secretion of hydrolytic enzymes (55). Therefore, these  
315 functions need to be accounted for by other gram-negative members of the microbial

316 communities. This study reveals the existence of a specialized bone-degrading microbiome in the  
317 marine environment and starts to explore the enzymatic activities involved in the complete  
318 demineralization of bone material.

### 319 **The role of *Osedax* endosymbionts in bone utilization**

320 *Osedax* species are known for their ability to acidify their environment via elevated expression  
321 levels of vacuolar-H<sup>+</sup>-ATPase (VHA) specifically in their root tissue and of carbonic anhydrase  
322 in their whole body to dissolve calcium phosphate and access collagen and lipids from the bone  
323 matrix (20). Miyamoto *et al.* found a high number of matrix metalloproteinases in the genome of  
324 *Osedax japonicus* compared to other invertebrates, potentially assisting in digestion of collagen  
325 and other proteins derived from bones (19). Two distinct bacterial endosymbiont genomes  
326 belonging to the order Oceanospirillales have previously been sequenced, but their role in bone  
327 degradation in the marine environment remained unclear (22). In this respect it is not surprising  
328 that the bacterial fraction of the herein sequenced *Osedax mucofloris* metagenome is made up of  
329 almost 27% Oceanospirillales affiliated reads, whereas the bone surface metagenome only  
330 contains 1.9% reads of this order (Figure S1b). This relative difference confirms that the  
331 methodological approach to minimize cross-contamination was successful and that the OB-  
332 MAGs affiliated to Oceanospirillales likely represent the symbiotic community of *Osedax*  
333 *mucofloris* worms. The Oceanospirillales symbionts most likely benefit from the bone  
334 degradation of their host, and therefore presumably do not reach high abundances in free-living  
335 assemblages on the bone surface. Two MAGs belonging to the Oceanospirillales were identified  
336 in the *Osedax*-associated metagenome, belonging to the genera *Neptunomonas* (OB1) and  
337 *Amphritea* (OB2). Both genera are known to have an aerobic organotrophic lifestyle. As  
338 hypothesized earlier for other *Osedax*-associated Oceanospirillales, their association with their



339 host might be casual and punctual, leading to a common benefit from a sudden nutrient bonanza  
340 (22, 25).

### 341 **The degradative functions within the bone microbiome**

#### 342 *Dissolution of inorganic compounds via a closed sulfur biogeochemical cycle*

343 Free-living microbial communities, however, must deal with the same challenges as *Osedax* to  
344 access the nutrient rich, collagen-rich organic bone matrix and eventually the lipid-rich bone  
345 marrow by dissolving the hydroxyapatite. The association in large specialized consortia may be a  
346 beneficial strategy for achieving this. We hypothesize that sulfur-driven geomicrobiology  
347 (sulfate/thiosulfate/tetrathionate reduction and sulfide/sulfur/thiosulfate oxidation) is the major  
348 responsible factor for bone dissolution in the marine environment by free-living bacterial  
349 communities. Campylobacterales are one of the most abundant bacterial orders in the herein  
350 investigated metagenomes, in both the *Osedax*-associated metagenomes (OB) and the bone  
351 surface biofilms (BB) (Supplementary figure S2). Campylobacterales represent the most  
352 abundant group in terms of absolute read number, although it is the second largest taxon with  
353 reconstructed MAGs (Figure 1). Members of the Campylobacterales have previously been found  
354 to be associated with *Osedax*, albeit not as endosymbionts (25). The majority of retrieved  
355 Campylobacterales MAGs (14 in total) belong to different families of aerobic and facultative  
356 anaerobic (nitrate, manganese) sulfur-oxidizing bacteria (56, 57) (Thiovulaceae, Sulfurovaceae  
357 and Arcobacteraceae). Other aerobic/facultatively anaerobic (nitrate) sulfur oxidizing bacteria  
358 are also well represented in the order Beggiatoales (Gammaproteobacteria, 5 MAGs). *Beggiatoa*-  
359 like bacterial mats are commonly associated with whale falls (58) indicating an indifference  
360 regarding the bone type they dwell on. Sulfide oxidation produces elemental sulfur or sulfate (41,

361 45) while releasing protons and thereby leading to a drop in pH. This acidification mechanism  
362 has been linked to bone demineralization. The dissolution of the hydroxyapatite mineral exposes  
363 the organic matrix to enzymatic degradation (33, 34). Our hypothesis that this process is taking  
364 place here is supported by the elevated numbers of P-type ATPases (especially H<sup>+</sup>-ATPases) (59,  
365 60) found in the Beggiatoales MAGs and other unclassified  $\gamma$ -proteobacteria. Besides thiotrophy,  
366 that seems to be a major acid-producing mechanism in the microbial community, other  
367 mechanisms might also contribute significantly. In this respect, fermentative activities such as  
368 lactate dehydrogenases (*ldh*) that seem to correlate with high presence of proton pump ATPases  
369 are frequent in the MAGs. Moreover, a number of carbonic anhydrases (CA) were annotated,  
370 normally housekeeping genes involved in internal pH homeostasis and other processes (61).  
371 Here, the CAs were found to contain signal peptides for extracellular export (19 out of 94) and  
372 therefore could also be involved in acidification. Interestingly, 18 out of 19 identified CAs  
373 belong to the  $\alpha$ -CA family and only one member of the  $\beta$ -CA family was found (Supplementary  
374 figure S4). The  $\alpha$ -CA family is only found in gram negative bacteria, which is also the case here,  
375 and it is evolutionarily the youngest of the three bacterial CA families (40).

376 Besides a large number of SOB, eight MAGs related to SRB were identified that are affiliated to  
377 the families Desulfobulbaceae (also SOB), Desulfobacteraceae, Geopsychrobacteraceae and  
378 Desulfovibrionaceae. Moreover, they are prevalently associated to the free-living community  
379 attached to the bone surface. Sulfate, tetrathionate or thiosulfate can serve as electron acceptors  
380 and/or donors and gene markers for all pathways are present in the metagenomes (Figure 2).  
381 Microbial sulfidogenesis on the bone surface or the surrounding sediments can feed the  
382 thiotrophic community and therefore accelerate the demineralization process. The generated  
383 sulfide is known to quickly react with iron, blackening the bone surfaces with insoluble iron

384 sulfide (62). In our incubation experiments, blackening is preferentially observed on the  
385 epiphysis, which is also where complex white/pink microbial mats are forming over time  
386 (supplementary figure S1B). However, SRB seem unable to degrade large complex molecules.  
387 This is supported by the lack of bone-degrading enzymes herein investigated, such as: S8/S53  
388 peptidases, mannosidases, sialidases, fucosidases and  $\alpha$ -galactosidases. SRB are likely dependent  
389 on the generation of simple organic compounds produced as metabolites by fermenters or  
390 aerobic organotrophic bacteria of the wider bone microbiome. The bone dissolution driven by  
391 sulfur geomicrobiology relies on other specialized members of the community to degrade the  
392 organic matrix and to fuel the acid generation.

#### 393 *Dissolution of organic compounds via peptidases, glucosidases and oxidases*

394 Once the inorganic hydroxyapatite is removed an array of different enzymes is required to digest  
395 the various organic bone components. Bacteroidia appear to be especially remarkable in this  
396 respect and represent the third most abundant taxon. Eight high quality MAGs could be  
397 reconstructed, seven of them from the bone surface metagenome. Bacteroidia, and especially the  
398 family of Flavobacteriaceae, are known to be versatile degraders of polysaccharides like agar  
399 (63), chitin (64), ulvan (65), alginate (66), carrageen (67), cellulose and xylanose (68) and  
400 polypeptides like elastin (69), spongin (70) and others. The recently described Marinifilaceae  
401 family (71) includes isolates that are reported to present xylanase activity (72). Despite the  
402 discrepancy between abundance versus reconstructed genomes, the Bacteroidia MAGs appear to  
403 be the most versatile order of the investigated MAGs in respect to their richness in bone  
404 degrading enzymes (Figure 4), and all were predicted to possess the gelatin hydrolysis trait  
405 (Figure 3). They were also the only MAGs containing sialidases (COG4409) and  $\alpha$ -  
406 galactosidases (Pfam16499) (Figure 4). Since most Bacteroidia MAGs were retrieved from the

407 surface associated microbiome, we assume that they play a pivotal role in the free-living  
408 community via the degradation of organic bone components.

409 Differential microbial colonization of the spongy cancellous bone tissue over the cortical  
410 compact bone has also been observed in the terrestrial environment and has been related to easier  
411 access to the red marrow (73). With complex microbial mats preferentially forming on the  
412 epiphysis of the long bones. Moreover, the epiphysis area is normally covered with hyaline  
413 cartilage (74) made of nonfibrous type II collagen and a sulfated-proteoglycan matrix rich in N-  
414 acetyl-galactosamine and glucuronic acid residues. This would explain the abundance of alpha-  
415 galactosidases, N-acetyl glucosaminidase and glucuronidases. Moreover, other groups such as  
416 Kiritimatiellales (PVC superphylum) are known marine anaerobic saccharolytic microbes  
417 specialized in degrading sulfated polymers that we find in this environment (75).

#### 418 *γ-proteobacteria - the collagen degraders*

419 Peptidases and especially M9 collagenases are of special interest to bone and collagen  
420 degradation. The class *γ-proteobacteria* is comparatively enriched in these enzymes and it is the  
421 best represented class in the dataset, with 17 MAGs. Of particular interest are the MAGs  
422 affiliated to the order Enterobacterales (two MAGs of the families Kangiellaceae and one  
423 Alteromonadaceae). They possess the gelatin hydrolysis trait (Figure 3, MAGs BB5, BB44 and  
424 OB12), have a high number of S1 and U32 peptidases, and are the only MAGs with M9  
425 collagenases. The *Colwellia* MAG BB5 is particularly remarkable as it contains an entire gene  
426 cluster dedicated to collagen utilization (Figure 5A). The collagen degradation gene cluster  
427 comprises at least 15 different genes, including a M9 collagenase, a PepQ proline dipeptidase, an  
428 aminopeptidase YpdF, several transporters, epimerase, isomerases and others. The gene cluster

429 encodes nearly the entire pathway (missing genes are encoded elsewhere in the genome, like  
430 P5CDH) necessary to unwind and hydrolyze triple-helical collagen, transport and uptake of  
431 collagen oligopeptides into the cell and utilization of its main components, mainly  
432 hydroxyproline and proline, for energy production via the TCA cycle and/or the urea cycle or for  
433 polyamine biosynthesis (Figure 5B). This kind of functional condensation for collagen utilization  
434 has not been described before in *Colwellia* or elsewhere. Interestingly, *Colwellia* bacteria are  
435 also one partner in a dual extracellular symbiosis with sulfur-oxidizing bacteria in the mussel  
436 *Terua* sp. ‘Guadelope’, retrieved from a whale fall in the Antilles arc and supposedly involved in  
437 the utilization and uptake of bone components (76). A cluster of functionally related genes was  
438 found in the publicly available genomes of *Colwellia piezophila* and *Colwellia psychrerythraea*.  
439 However, the gene cluster described for MAG BB5 contains several supplementary features  
440 attributed to collagen utilization absent in the published genomes (Figure 6). Moreover, the gene  
441 cluster contains regulatory elements like the PutR regulator and stringent starvation proteins  
442 known to be activated under acid stress or amino acid starvation conditions in *Escherichia coli*  
443 (77). This supports our hypothesis that other members of the microbial community need to  
444 dissolve the bone calcium phosphate via acid secretion, before collagen and other organic bone  
445 compounds can be accessed.

#### 446 *Bone degradation – a complex microbial community effort*

447 The marine bone microbiome is a complex assemblage of various bacterial classes that requires  
448 the synergistic action of many different interwoven enzymatic reactions to access the recalcitrant  
449 bone material for its nutritional resources. A scenario how we envision the orchestration of this  
450 complex process is depicted in Figure 7. The primary requirement in utilizing organic bone  
451 compounds is likely the dissolution of mineralized calcium phosphate (hydroxyapatite) by

452 acidification, which can potentially be performed via proton release by a versatile community of  
453 sulfur-oxidizing (SOB)  $\gamma$ -proteobacteria (mainly *Beggiatoa*-like), Campylobacterales  
454 (*Sulfurimonas*, *Sufurospirillum*, *Sulfurovum*), Desulfobubales and  $\alpha$ -proteobacteria (Figure 7-I).  
455 This acidification via thiotrophy may be fueled by sulfur-reducing bacteria (SRB), like  
456 Desulfobacteraceae, Geopsychrobacteraceae, *Pseudodesulfovibrio*, creating a sulfur  
457 biogeochemical loop between SRB and SOB (Figure 7-II). Once the organic compounds  
458 (collagen, fatty acids, proteins, peptidoglycans) are accessible, the Bacteroidia  
459 (Flavobacteriaceae and Marinifiliaceae) and  $\gamma$ -proteobacteria (Alteromonadaceae and  
460 Kangiellaceae) may become the main protagonists (Figure 7 -III and IV). These Bacteroidia are  
461 especially rich in bone degrading enzymes, but importantly the  $\gamma$ -proteobacteria are the only  
462 members identified with M9 collagenases and *Colwellia* contains an entire gene cluster dedicated  
463 to collagen degradation (Figure 5). Herein we disentangled the potential functional roles of  
464 specialized members of the bone-degrading microbial community, which together make bone-  
465 derived nutrients accessible – not only to themselves, but also to generalists within the bone  
466 microbiome. We posit that Flavobacteriales and Enterobacterales are the most promising  
467 candidates for novel enzyme discovery, as they display the most versatile sets of bone degrading  
468 enzymes.

469

470

471

472

473

## 474 **Materials and Methods**

### 475 **Sample collection**

476 Four sets of turkey thigh bones and one bovine lower leg bone were deposited in Byfjorden  
477 (60,238185N; 5,181210E) close to Bergen, Norway, at a depth of 68 m in May 2016, incubated  
478 for nine months and retrieved using a small ROV (Table 1). The material was transported to the  
479 lab in Styrofoam boxes for either processing within two hours or for prolonged incubation in  
480 seawater aquaria. Bone surfaces were scraped for microorganisms and *Osedax mucofloris*  
481 specimens were extracted from the bone, preserved in storage solution (700 g/l ammonium  
482 sulfate, 20 mM sodium citrate and 25 mM EDTA, pH 5.2) and stored at -20 °C until further  
483 processing.

### 484 **DNA extraction and sequencing**

485 DNA was extracted from 10 to 50 mg sample using the Qiagen AllPrep DNA/RNA Mini Kit  
486 according to the manufacturer's instructions with cell lysis by a bead beating step in Lysing  
487 Matrix E tubes (MP Biomedicals) in a FastPrep homogenizer (MP Biomedicals) with a single  
488 cycle of 30s at a speed of 5500 rpm. The obtained metagenomic DNA was quantified and quality  
489 controlled using a NanoDrop2000 (ThermoFisher Scientific) and a Qubit fluorometer 3.0  
490 (ThermoFisher Scientific). The metagenomic DNA was sequenced on an Illumina HiSeq4000  
491 platform (150-bp paired-end reads) using Nextera library preparations at the Institute of Clinical  
492 Molecular Biology (IKMB), Kiel University, Germany.

### 493 **SSU rRNA gene profiling**

494 Illumina raw reads were quality trimmed and adapters were removed with Trimmomatic version  
495 0.36 (78). The quality filtered reads were combined with respect to their sample source (either  
496 *Osedax*-associated or bone surface biofilms) and used for SSU rRNA gene profiling with  
497 phyloFlash version 3.3b1 (79). In brief, phyloFlash extracts all SSU rRNA gene containing reads  
498 from a metagenomic read dataset, assembles them using SPAdes (80) and calculates a taxonomic  
499 profile of the given metagenome. The phyloFlash pipeline was run using the `–almosteverything`  
500 option and operating at `–taxlevel 2`, to identify SSU rRNA gene reads up to an order level. The  
501 outputs for both metagenomic sample pools were compared using the `phyloFlash_compare.pl`  
502 script to generate barplots and heatmaps.

### 503 **Metagenomic assembly, binning, taxonomic identification, ORF prediction and annotation**

504 For each sample type (*Osedax mucofloris* and bone surface biofilm communities), the quality  
505 filtered metagenomic reads were co-assembled with SPAdes v3.12 (80) for kmers 21, 33, 55, 77  
506 and 99, with the metaSPAdes-assembler option enabled. Binning was conducted on the resulting  
507 assemblies using the MetaWRAP pipeline (81). This pipeline combines three different  
508 implemented binning methods, CONCOCT (82), MaxBin2.0 (83) and metaBAT2 (84), to  
509 retrieve high quality MAGs. We only considered high-quality MAGs with >90% completeness  
510 and <10% redundancy for further analyses. CheckM was used for quality assessment of the  
511 assembled genomes (85), and GTDB-Tk version 0.1.3 (36) was used for taxonomic  
512 identification, coupled with an estimate of relative evolutionary divergence (RED) to their next  
513 common ancestor. RED is a normalization method to assign taxonomic ranks according to  
514 lineage-specific rates of evolution, based on branch lengths and internal nodes in relation to the  
515 last common ancestor calculated by GTDBTk. Alluvial diagrams based on taxonomic affiliations  
516 were designed with RAWgraphs (86). Open reading frames (ORF) of the obtained MAGs were



517 predicted with Prodigal version 2.6.3 (87). Predicted ORFs were annotated using eggNOG-  
518 mapper v1 (88) with eggNOG orthology data version 4.5 (89). Additionally, the MAGs were  
519 annotated and metabolic models were calculated using the RAST (Rapid Annotation using  
520 Subsystem Technology) server (90-92). The MAGs were further investigated for the presence or  
521 absence of major metabolic pathways and phenotypic microbial traits based on their genomic  
522 sequences using MEBS (Multigenomic Entropy Based Score) (37) and Traitair (39).  
523 Phylogenomic trees were drawn with iTOL (93, 94) and heatmaps were visualized with  
524 Heatmapper (95). Gene cluster maps were drawn with Gene Graphics (96). Signal peptides were  
525 predicted with SignalP-5.0 server using nucleotide sequences to predict the presence of Sec/SPI,  
526 Tat/SPI and Sec/SPII signal peptides in a given sequence (97).

## 527 **Enzyme profiling**

528 Based on the organic composition of bone matrix, we hypothesized twelve enzyme families to be  
529 necessary for its degradation. Accordingly, the following enzymes were selected for in-depth  
530 studies: (i) M9 collagenases (pfam01752), S1 peptidases (COG0265), S8/S53 peptidases  
531 (pfam00082) and U32 proteases (COG0826) which hydrolyze peptide bonds in collagen and  
532 glycoproteins; (ii) sialidases (COG4409),  $\beta$ -d-glucuronidases (COG3250),  $\beta$ -N-acetyl-d-  
533 glucosaminidases (COG1472) which cleave glycosidic linkages, and (iii)  $\alpha$ -N-  
534 acetylgalactosaminidases (COG0673),  $\alpha$ -galactosidases (pfam16499), fucosidases (COG3669),  
535 mannosidases (COG0383) and cholesterol oxidases (COG2303) which degrade lipids such as  
536 cholesterol. One reference database for each of these families was generated using the NCBI  
537 repository, based on sequences from 287 M9 collagenases, 4453 S1 peptidases, 3237 S8/S53  
538 peptidases, 3653 U32 proteases, 267 COG4409, 873 COG3250, 1274 COG1472, 6140  
539 COG0673, 279 COG3669, 206 COG0383 and 1119 COG2303. The databases included the

540 closest protein homologs of all protein families of interest for bone-degradation, and at least one  
541 representative sequence from all taxonomic groups (containing such enzymes) was represented.  
542 The reference databases were used to generate Hidden Markov Model (HMM) profiles for each  
543 enzyme family with HMMER version 3.1b1 (98) using the *hmmbuild* option after an alignment  
544 of each sequence set was built with Clustal W version 2.1 (99). The MAGs were screened for the  
545 twelve enzyme families of interest using the generated HMM profiles using HMMer version  
546 3.1b1 with the *hmmsearch* option and a bitscore threshold of 100.

#### 547 **Data availability**

548 The raw sequencing reads have been deposited in the sequence read archive (SRA) of NCBI  
549 under the BioProject ID PRJNA606180 and with the BioSample accession numbers  
550 SAMN14086998 (A5), SAMN14087000 (A9), SAMN14087001 (A9n), SAMN14087003 (B4),  
551 SAMN14087005 (D1), SAMN14087006 (D2), SAMN14087007 (I1) and SAMN14087008 (I3).

552

553

554

555

556

557

558

559

560

561 **Authors contributions**

562 T.D., E.B., A.G.M. and G.E.K.B. developed the conceptual idea, conducted the sampling of the  
563 source material, contributed to content, reviewed and edited the manuscript. S.S.C., E.B. and  
564 M.F. identified enzymes of interest, constructed the reference databases and aided in result  
565 interpretation. E.B., B.S., S.F. and A.G.M. conducted bioinformatic analyses and E.B., B.S. and  
566 U.H. wrote the manuscript.

567 **Acknowledgments**

568 To the memory of Prof. Hans Tore Rapp and his effort on characterizing *Osedax mucofloris*. We  
569 acknowledge financial support of ERA-NET Marine Biotechnology (GA no.: 604814) funded  
570 under the FP7 ERA-NET scheme and nationally managed from the German Federal Ministry of  
571 Education and Research and Norwegian Research Council. M.F. acknowledges the Spanish  
572 Ministry support of Economythe grants PCIN-2017-078 (within the Marine Biotechnology ERA-  
573 NET) and BIO2017-85522-R from the Ministerio de Economía y Competitividad, Ministerio de  
574 Ciencia, Innovación y Universidades (MCIU), Agencia Estatal de Investigación (AEI), Fondo  
575 Europeo de Desarrollo Regional (FEDER) and Competiveness. Additional funding was received  
576 from the Norwegian Biodiversity Information Centre (PA 809116 knr. 47-14). We thank Hans T.  
577 Kleivdal for early developments of the concept. We thank Norilia AS for supplying bone residue  
578 material for the field work and ROV AS for providing underwater services during the  
579 deployment and sampling campaign. The authors acknowledge Kira S. Makarova at the National  
580 Center for Biotechnology Information (NCBI, Bethesda MD, USA) for help during the design of  
581 the reference database of enzyme families relevant to bone degradation.

582

583 **References**

- 584 1. Debashish G, Malay S, Barindra S, Joydeep M. 2005. Marine enzymes. *Adv Biochem*  
585 *Eng Biotechnol* 96:189-218.
- 586 2. Imhoff JF, Labes A, Wiese J. 2011. Bio-mining the microbial treasures of the ocean: new  
587 natural products. *Biotechnol Adv* 29:468-82.
- 588 3. Trincone A. 2011. Marine biocatalysts: enzymatic features and applications. *Mar Drugs*  
589 9:478-99.
- 590 4. Adams MW, Perler FB, Kelly RM. 1995. Extremozymes: expanding the limits of  
591 biocatalysis. *Biotechnology (N Y)* 13:662-8.
- 592 5. Aertsen A, Meersman F, Hendrickx ME, Vogel RF, Michiels CW. 2009. *Biotechnology*  
593 *under high pressure: applications and implications. Trends Biotechnol* 27:434-41.
- 594 6. Cavicchioli R, Siddiqui KS, Andrews D, Sowers KR. 2002. Low-temperature  
595 extremophiles and their applications. *Curr Opin Biotechnol* 13:253-61.
- 596 7. Feller G, Gerday C. 2003. Psychrophilic enzymes: hot topics in cold adaptation. *Nat Rev*  
597 *Microbiol* 1:200-8.
- 598 8. Alcaide M, Tchigvintsev A, Martínez-Martínez M, Popovic A, Reva ON, Lafraya Á,  
599 Bargiela R, Nechitaylo TY, Matesanz R, Cambon-Bonavita MA, Jebbar M, Yakimov  
600 MM, Savchenko A, Golyshina OV, Yakunin AF, Golyshin PN, Ferrer M, Consortium M.  
601 2015. Identification and characterization of carboxyl esterases of gill chamber-associated  
602 microbiota in the deep-sea shrimp *Rimicaris exoculata* by using functional  
603 metagenomics. *Appl Environ Microbiol* 81:2125-36.

- 604 9. Cowan D, Meyer Q, Stafford W, Muyanga S, Cameron R, Wittwer P. 2005.  
605 Metagenomic gene discovery: past, present and future. *Trends Biotechnol* 23:321-9.
- 606 10. Handelsman J. 2004. Metagenomics: application of genomics to uncultured  
607 microorganisms. *Microbiol Mol Biol Rev* 68:669-85.
- 608 11. Kennedy J, O'Leary ND, Kiran GS, Morrissey JP, O'Gara F, Selvin J, Dobson AD. 2011.  
609 Functional metagenomic strategies for the discovery of novel enzymes and biosurfactants  
610 with biotechnological applications from marine ecosystems. *J Appl Microbiol* 111:787-  
611 99.
- 612 12. Kodzius R, Gojobori T. 2015. Marine metagenomics as a source for bioprospecting. *Mar*  
613 *Genomics* 24 Pt 1:21-30.
- 614 13. Popovic A, Tchigvintsev A, Tran H, Chernikova TN, Golyshina OV, Yakimov MM,  
615 Golyshin PN, Yakunin AF. 2015. Metagenomics as a Tool for Enzyme Discovery:  
616 Hydrolytic Enzymes from Marine-Related Metagenomes. *Adv Exp Med Biol* 883:1-20.
- 617 14. Jørgensen BB, Boetius A. 2007. Feast and famine--microbial life in the deep-sea bed. *Nat*  
618 *Rev Microbiol* 5:770-81.
- 619 15. Naganuma T. 2000. [Microbes on the edge of global biosphere]. *Biol Sci Space* 14:323-  
620 31.
- 621 16. Sogin ML, Morrison HG, Huber JA, Mark Welch D, Huse SM, Neal PR, Arrieta JM,  
622 Herndl GJ. 2006. Microbial diversity in the deep sea and the underexplored "rare  
623 biosphere". *Proc Natl Acad Sci U S A* 103:12115-20.
- 624 17. Smith C, Baco A. 2003. Ecology of whale falls at the deep-sea floor, p 311-354. *In*  
625 Gibson R, Atkinson R (ed), *Oceanography and Marine Biology: an Annual Review*, vol  
626 41. Taylor&Francis.

- 627 18. Rouse GW, Goffredi SK, Vrijenhoek RC. 2004. Osedax: bone-eating marine worms with  
628 dwarf males. *Science* 305:668-71.
- 629 19. Miyamoto N, Yoshida MA, Koga H, Fujiwara Y. 2017. Genetic mechanisms of bone  
630 digestion and nutrient absorption in the bone-eating worm *Osedax japonicus* inferred  
631 from transcriptome and gene expression analyses. *BMC Evol Biol* 17:17.
- 632 20. Tresguerres M, Katz S, Rouse GW. 2013. How to get into bones: proton pump and  
633 carbonic anhydrase in *Osedax* boneworms. *Proc Biol Sci* 280:20130625.
- 634 21. Higgs ND, Glover AG, Dahlgren TG, Little CT. 2011. Bone-boring worms:  
635 characterizing the morphology, rate, and method of bioerosion by *Osedax mucofloris*  
636 (Annelida, Siboglinidae). *Biol Bull* 221:307-16.
- 637 22. Goffredi SK, Yi H, Zhang Q, Klann JE, Struve IA, Vrijenhoek RC, Brown CT. 2014.  
638 Genomic versatility and functional variation between two dominant heterotrophic  
639 symbionts of deep-sea *Osedax* worms. *ISME J* 8:908-24.
- 640 23. Goffredi SK, Orphan VJ, Rouse GW, Jahnke L, Embaye T, Turk K, Lee R, Vrijenhoek  
641 RC. 2005. Evolutionary innovation: a bone-eating marine symbiosis. *Environ Microbiol*  
642 7:1369-78.
- 643 24. Goffredi SK, Johnson SB, Vrijenhoek RC. 2007. Genetic diversity and potential function  
644 of microbial symbionts associated with newly discovered species of *Osedax* polychaete  
645 worms. *Appl Environ Microbiol* 73:2314-23.
- 646 25. Verna C, Ramette A, Wiklund H, Dahlgren TG, Glover AG, Gaill F, Dubilier N. 2010.  
647 High symbiont diversity in the bone-eating worm *Osedax mucofloris* from shallow  
648 whale-falls in the North Atlantic. *Environ Microbiol* 12:2355-70.

- 649 26. Glover AG, Källström B, Smith CR, Dahlgren TG. 2005. World-wide whale worms? A  
650 new species of *Osedax* from the shallow north Atlantic. *Proc Biol Sci* 272:2587-92.
- 651 27. Schander C, Rapp H, Dahlgren T. 2010. *Osedax mucofloris* (Polychaeta, Siboglinidae),  
652 a bone-eating marine worm new to Norway. *Fauna Norvegica* 30:5-8.
- 653 28. Dahlgren T, Wiklund H, Källström B, Lundälv T, Smith C, Glover A. 2006. A shallow-  
654 water whale-fall experiment in the North Atlantic. *Cahiers De Biologie Marine* 47:385-  
655 389.
- 656 29. Robey PG. 2008. Noncollagenous bone matrix proteins, p 335-349. *In* Bilezikian JP,  
657 Raisz LG, Martin JT (ed), *Principles of bone biology*, Third edition ed, vol Volume I.  
658 Academic press.
- 659 30. Sato S, Rahemtulla F, Prince CW, Tomana M, Butler WT. 2009. Acidic glycoproteins  
660 from bovine compact bone. *Connective Tissue Research* 14:51-64.
- 661 31. Kuboki Y, Watanabe T, Tazaki M, Takita H. 1991. Comparative biochemistry of bone  
662 matrix proteins in bovine and fish. *In* Suga S, Nakahara H (ed), *Mechanisms and*  
663 *phylogeny of mineralization in biological systems*. Springer, Tokyo.
- 664 32. Shoulders MD, Raines RT. 2009. Collagen structure and stability. *Annu Rev Biochem*  
665 78:929-58.
- 666 33. Vietti L, Bailey J, Ricci E. 2014. Insights into the microbial degradation of bone in  
667 marine environments from rRNA gene sequencing of biofilms on lab-simulated carcass-  
668 falls. *The Paleontological Society Special Publications*:120-121.
- 669 34. Vietti LA. 2014. Insights into the microbial degradation of bones from the marine  
670 vertebrate fossil record: an experimental approach using interdisciplinary analyses. Ph.D.  
671 dissertation. University of Minnesota, University of Minnesota Digital Conservancy.

- 672 35. Freitas RC, Marques HIF, Silva MACD, Cavalett A, Odisi EJ, Silva BLD, Montemor JE,  
673 Toyofuku T, Kato C, Fujikura K, Kitazato H, Lima AOS. 2019. Evidence of selective  
674 pressure in whale fall microbiome proteins and its potential application to industry. *Mar*  
675 *Genomics* 45:21-27.
- 676 36. Parks DH, Chuvochina M, Waite DW, Rinke C, Skarshewski A, Chaumeil PA,  
677 Hugenholtz P. 2018. A standardized bacterial taxonomy based on genome phylogeny  
678 substantially revises the tree of life. *Nat Biotechnol* 36:996-1004.
- 679 37. De Anda V, Zapata-Peñasco I, Poot-Hernandez AC, Eguiarte LE, Contreras-Moreira B,  
680 Souza V. 2017. MEBS, a software platform to evaluate large (meta)genomic collections  
681 according to their metabolic machinery: unraveling the sulfur cycle. *Gigascience* 6:1-17.
- 682 38. Müller AL, Kjeldsen KU, Rattei T, Pester M, Loy A. 2015. Phylogenetic and  
683 environmental diversity of DsrAB-type dissimilatory (bi)sulfite reductases. *ISME J*  
684 9:1152-65.
- 685 39. Weimann A, Mooren K, Frank J, Pope PB, Bremges A, McHardy AC. 2016. From  
686 Genomes to Phenotypes: TraitAr, the Microbial Trait Analyzer. *mSystems* 1.
- 687 40. Capasso C, Supuran CT. 2015. An overview of the alpha-, beta- and gamma-carbonic  
688 anhydrases from Bacteria: can bacterial carbonic anhydrases shed new light on evolution  
689 of bacteria? *J Enzyme Inhib Med Chem* 30:325-32.
- 690 41. Yamamoto M, Takai K. 2011. Sulfur metabolisms in epsilon- and gamma-proteobacteria  
691 in deep-sea hydrothermal fields. *Front Microbiol* 2:192.
- 692 42. Muyzer G, Stams AJ. 2008. The ecology and biotechnology of sulphate-reducing  
693 bacteria. *Nat Rev Microbiol* 6:441-54.



- 694 43. Barton LL, Fauque GD. 2009. Biochemistry, physiology and biotechnology of sulfate-  
695 reducing bacteria. *Adv Appl Microbiol* 68:41-98.
- 696 44. Kruse S, Goris T, Westermann M, Adrian L, Diekert G. 2018. Hydrogen production by  
697 *Sulfurospirillum* species enables syntrophic interactions of Epsilonproteobacteria. *Nat*  
698 *Commun* 9:4872.
- 699 45. Schulz HN, Jorgensen BB. 2001. Big bacteria. *Annu Rev Microbiol* 55:105-37.
- 700 46. Gevertz D, Telang AJ, Voordouw G, Jenneman GE. 2000. Isolation and characterization  
701 of strains CVO and FWKO B, two novel nitrate-reducing, sulfide-oxidizing bacteria  
702 isolated from oil field brine. *Appl Environ Microbiol* 66:2491-501.
- 703 47. Poser A, Vogt C, Knöller K, Ahlheim J, Weiss H, Kleinstüber S, Richnow HH. 2014.  
704 Stable sulfur and oxygen isotope fractionation of anoxic sulfide oxidation by two  
705 different enzymatic pathways. *Environ Sci Technol* 48:9094-102.
- 706 48. Trojan D, Schreiber L, Bjerg JT, Bøggild A, Yang T, Kjeldsen KU, Schramm A. 2016. A  
707 taxonomic framework for cable bacteria and proposal of the candidate genera  
708 *Electrothrix* and *Electronema*. *Syst Appl Microbiol* 39:297-306.
- 709 49. Pfeffer C, Larsen S, Song J, Dong M, Besenbacher F, Meyer RL, Kjeldsen KU, Schreiber  
710 L, Gorby YA, El-Naggar MY, Leung KM, Schramm A, Risgaard-Petersen N, Nielsen  
711 LP. 2012. Filamentous bacteria transport electrons over centimetre distances. *Nature*  
712 491:218-21.
- 713 50. Aerssens J, Boonen S, Lowet G, Dequeker J. 1998. Interspecies differences in bone  
714 composition, density, and quality: potential implications for in vivo bone research.  
715 *Endocrinology* 139:663-70.

- 716 51. Gontang EA, Fenical W, Jensen PR. 2007. Phylogenetic diversity of gram-positive  
717 bacteria cultured from marine sediments. *Appl Environ Microbiol* 73:3272-82.
- 718 52. Teske A, Brinkhoff T, Muyzer G, Moser DP, Rethmeier J, Jannasch HW. 2000. Diversity  
719 of thiosulfate-oxidizing bacteria from marine sediments and hydrothermal vents. *Appl*  
720 *Environ Microbiol* 66:3125-33.
- 721 53. Leloup J, Fossing H, Kohls K, Holmkvist L, Borowski C, Jørgensen BB. 2009. Sulfate-  
722 reducing bacteria in marine sediment (Aarhus Bay, Denmark): abundance and diversity  
723 related to geochemical zonation. *Environ Microbiol* 11:1278-91.
- 724 54. Cotter PD, Hill C. 2003. Surviving the acid test: responses of gram-positive bacteria to  
725 low pH. *Microbiol Mol Biol Rev* 67:429-53, table of contents.
- 726 55. Anné J, Economou A, Bernaerts K. 2017. Protein Secretion in Gram-Positive Bacteria:  
727 From Multiple Pathways to Biotechnology. *Curr Top Microbiol Immunol* 404:267-308.
- 728 56. Lastovica A, On S, Zhang L. 2014. The family *Campylobacteraceae*, p 307-335. *In*  
729 *Rosenburg E, DeLong E, Lory S, Stackebrandt E, Thompson F (ed), The Prokaryotes*.  
730 Springer.
- 731 57. Takai K, Campbell BJ, Cary SC, Suzuki M, Oida H, Nunoura T, Hirayama H, Nakagawa  
732 S, Suzuki Y, Inagaki F, Horikoshi K. 2005. Enzymatic and genetic characterization of  
733 carbon and energy metabolisms by deep-sea hydrothermal chemolithoautotrophic isolates  
734 of Epsilonproteobacteria. *Appl Environ Microbiol* 71:7310-20.
- 735 58. Deming JW, Reysenbach AL, Macko SA, Smith CR. 1997. Evidence for the microbial  
736 basis of a chemoautotrophic invertebrate community at a whale fall on the deep seafloor:  
737 bone-colonizing bacteria and invertebrate endosymbionts. *Microsc Res Tech* 37:162-70.
- 738 59. Palmgren MG, Nissen P. 2011. P-type ATPases. *Annu Rev Biophys* 40:243-66.

- 739 60. Morth JP, Pedersen BP, Buch-Pedersen MJ, Andersen JP, Vilsen B, Palmgren MG,  
740 Nissen P. 2011. A structural overview of the plasma membrane Na<sup>+</sup>,K<sup>+</sup>-ATPase and H<sup>+</sup>-  
741 ATPase ion pumps. *Nat Rev Mol Cell Biol* 12:60-70.
- 742 61. Supuran CT, Capasso C. 2017. An Overview of the Bacterial Carbonic Anhydrases.  
743 *Metabolites* 7.
- 744 62. Vietti L, Bailey J, Fox D, Rogers R. 2015. Rapid formation of framboidal sulfides on  
745 bone surfaces from a simulated marine carcass fall. *PALAIOS* 30:327-334.
- 746 63. Naretto A, Fanuel M, Ropartz D, Rogniaux H, Larocque R, Czjzek M, Tellier C, Michel  
747 G. 2019. The agar-specific hydrolase. *J Biol Chem* 294:6923-6939.
- 748 64. Nedashkovskaya OI, Kim SG, Stenkova AM, Kukhlevskiy AD, Zhukova NV, Mikhailov  
749 VV. 2018. *Aquimarina algiphila* sp. nov., a chitin degrading bacterium isolated from the  
750 red alga *Tichocarpus crinitus*. *Int J Syst Evol Microbiol* 68:892-898.
- 751 65. Konasani VR, Jin C, Karlsson NG, Albers E. 2018. A novel ulvan lyase family with  
752 broad-spectrum activity from the ulvan utilisation loci of *Formosa agariphila* KMM 3901.  
753 *Sci Rep* 8:14713.
- 754 66. Li S, Wang L, Chen X, Zhao W, Sun M, Han Y. 2018. Cloning, Expression, and  
755 Biochemical Characterization of Two New Oligoalginate Lyases with Synergistic  
756 Degradation Capability. *Mar Biotechnol (NY)* 20:75-86.
- 757 67. Shen J, Chang Y, Chen F, Dong S. 2018. Expression and characterization of a  $\kappa$ -  
758 carrageenase from marine bacterium *Wenyngzhuangia aestuarii* OF219: A  
759 biotechnological tool for the depolymerization of  $\kappa$ -carrageenan. *Int J Biol Macromol*  
760 112:93-100.

- 761 68. Tan H, Miao R, Liu T, Yang L, Yang Y, Chen C, Lei J, Li Y, He J, Sun Q, Peng W, Gan  
762 B, Huang Z. 2018. A bifunctional cellulase-xylanase of a new *Chryseobacterium* strain  
763 isolated from the dung of a straw-fed cattle. *Microb Biotechnol* 11:381-398.
- 764 69. Rochat T, Pérez-Pascual D, Nilsen H, Carpentier M, Bridel S, Bernardet JF, Duchaud E.  
765 2019. Identification of a Novel Elastin-Degrading Enzyme from the Fish Pathogen. *Appl*  
766 *Environ Microbiol* 85.
- 767 70. Choi KD, Lee GE, Park JS. 2018. *Aquimarina spongiicola* sp. nov., isolated from  
768 spongin. *Int J Syst Evol Microbiol* 68:990-994.
- 769 71. Iino T, Mori K, Itoh T, Kudo T, Suzuki K, Ohkuma M. 2014. Description of *Mariniphaga*  
770 *anaerophila* gen. nov., sp. nov., a facultatively aerobic marine bacterium isolated from  
771 tidal flat sediment, reclassification of the *Draconibacteriaceae* as a later heterotypic  
772 synonym of the *Prolixibacteraceae* and description of the family *Marinifilaceae* fam. nov.  
773 *Int J Syst Evol Microbiol* 64:3660-7.
- 774 72. Han Z, Shang-Guan F, Yang J. 2019. Molecular and Biochemical Characterization of a  
775 Bimodular Xylanase From. *Front Microbiol* 10:1507.
- 776 73. Emmons A, Mundorff A, Keenan S, Davoren J, Andronowski J, Carter D, DeBruyn J.  
777 2019. Patterns of microbial colonization of human bone from surface-decomposed  
778 remains. bioRxiv 664482.
- 779 74. Robey P. 2002. Bone matrix proteoglycans and glycoproteins. *In* Bilezikian J, Raisz L,  
780 Rodan G (ed), *Principles of bone biology*, 2nd Edition ed. Elsevier.
- 781 75. van Vliet DM, Palakawong Na Ayudthaya S, Diop S, Villanueva L, Stams AJM,  
782 Sánchez-Andrea I. 2019. Anaerobic Degradation of Sulfated Polysaccharides by Two  
783 Novel. *Front Microbiol* 10:253.

- 784 76. S D, O G. 2016. Colwellia and sulfur-oxidizing bacteria: An unusual dual symbiosis in a  
785 Terua mussel (Mytilidae: Bathymodiolinae) from whale falls in the Antilles arc. Deep  
786 Sea Research Part I 115:112-122.
- 787 77. Hansen AM, Qiu Y, Yeh N, Blattner FR, Durfee T, Jin DJ. 2005. SspA is required for  
788 acid resistance in stationary phase by downregulation of H-NS in Escherichia coli. Mol  
789 Microbiol 56:719-34.
- 790 78. Bolger AM, Lohse M, Usadel B. 2014. Trimmomatic: a flexible trimmer for Illumina  
791 sequence data. Bioinformatics 30:2114-20.
- 792 79. Gruber-Vodicka HR, Seah BKB, Pruesse E. 2019. phyloFlash - Rapid SSU rRNA  
793 profiling and targeted assembly from metagenomes. bioRxiv.
- 794 80. Bankevich A, Nurk S, Antipov D, Gurevich AA, Dvorkin M, Kulikov AS, Lesin VM,  
795 Nikolenko SI, Pham S, Pribelski AD, Pyshkin AV, Sirotkin AV, Vyahhi N, Tesler G,  
796 Alekseyev MA, Pevzner PA. 2012. SPAdes: a new genome assembly algorithm and its  
797 applications to single-cell sequencing. J Comput Biol 19:455-77.
- 798 81. Uritskiy GV, DiRuggiero J, Taylor J. 2018. MetaWRAP-a flexible pipeline for genome-  
799 resolved metagenomic data analysis. Microbiome 6:158.
- 800 82. Alneberg J, Bjarnason BS, de Bruijn I, Schirmer M, Quick J, Ijaz UZ, Lahti L, Loman  
801 NJ, Andersson AF, Quince C. 2014. Binning metagenomic contigs by coverage and  
802 composition. Nat Methods 11:1144-6.
- 803 83. Wu YW, Simmons BA, Singer SW. 2016. MaxBin 2.0: an automated binning algorithm  
804 to recover genomes from multiple metagenomic datasets. Bioinformatics 32:605-7.

- 805 84. Kang DD, Li F, Kirton E, Thomas A, Egan R, An H, Wang Z. 2019. MetaBAT 2: an  
806 adaptive binning algorithm for robust and efficient genome reconstruction from  
807 metagenome assemblies. *PeerJ* 7:e7359.
- 808 85. Parks DH, Imelfort M, Skennerton CT, Hugenholtz P, Tyson GW. 2015. CheckM:  
809 assessing the quality of microbial genomes recovered from isolates, single cells, and  
810 metagenomes. *Genome Res* 25:1043-55.
- 811 86. Mauri M, Elli, T., Caviglia, G., Uboldi, G., & Azzi, M. RAWGraphs: A Visualisation  
812 Platform to Create Open Outputs., p. *In* (ed),
- 813 87. Hyatt D, Chen GL, Locascio PF, Land ML, Larimer FW, Hauser LJ. 2010. Prodigal:  
814 prokaryotic gene recognition and translation initiation site identification. *BMC*  
815 *Bioinformatics* 11:119.
- 816 88. Huerta-Cepas J, Forslund K, Coelho LP, Szklarczyk D, Jensen LJ, von Mering C, Bork P.  
817 2017. Fast Genome-Wide Functional Annotation through Orthology Assignment by  
818 eggNOG-Mapper. *Mol Biol Evol* 34:2115-2122.
- 819 89. Huerta-Cepas J, Szklarczyk D, Forslund K, Cook H, Heller D, Walter MC, Rattei T,  
820 Mende DR, Sunagawa S, Kuhn M, Jensen LJ, von Mering C, Bork P. 2016. eggNOG 4.5:  
821 a hierarchical orthology framework with improved functional annotations for eukaryotic,  
822 prokaryotic and viral sequences. *Nucleic Acids Res* 44:D286-93.
- 823 90. Aziz RK, Bartels D, Best AA, DeJongh M, Disz T, Edwards RA, Formsma K, Gerdes S,  
824 Glass EM, Kubal M, Meyer F, Olsen GJ, Olson R, Osterman AL, Overbeek RA, McNeil  
825 LK, Paarmann D, Paczian T, Parrello B, Pusch GD, Reich C, Stevens R, Vassieva O,  
826 Vonstein V, Wilke A, Zagnitko O. 2008. The RAST Server: rapid annotations using  
827 subsystems technology. *BMC Genomics* 9:75.

- 828 91. Brettin T, Davis JJ, Disz T, Edwards RA, Gerdes S, Olsen GJ, Olson R, Overbeek R,  
829 Parrello B, Pusch GD, Shukla M, Thomason JA, Stevens R, Vonstein V, Wattam AR,  
830 Xia F. 2015. RASTtk: a modular and extensible implementation of the RAST algorithm  
831 for building custom annotation pipelines and annotating batches of genomes. *Sci Rep*  
832 5:8365.
- 833 92. Overbeek R, Olson R, Pusch GD, Olsen GJ, Davis JJ, Disz T, Edwards RA, Gerdes S,  
834 Parrello B, Shukla M, Vonstein V, Wattam AR, Xia F, Stevens R. 2014. The SEED and  
835 the Rapid Annotation of microbial genomes using Subsystems Technology (RAST).  
836 *Nucleic Acids Res* 42:D206-14.
- 837 93. Letunic I, Bork P. 2007. Interactive Tree Of Life (iTOL): an online tool for phylogenetic  
838 tree display and annotation. *Bioinformatics* 23:127-8.
- 839 94. Letunic I, Bork P. 2019. Interactive Tree Of Life (iTOL) v4: recent updates and new  
840 developments. *Nucleic Acids Res* 47:W256-W259.
- 841 95. Babicki S, Arndt D, Marcu A, Liang Y, Grant JR, Maciejewski A, Wishart DS. 2016.  
842 Heatmapper: web-enabled heat mapping for all. *Nucleic Acids Res* 44:W147-53.
- 843 96. Harrison KJ, Crécy-Lagard V, Zallot R. 2018. Gene Graphics: a genomic neighborhood  
844 data visualization web application. *Bioinformatics* 34:1406-1408.
- 845 97. Almagro Armenteros JJ, Tsirigos KD, Sønderby CK, Petersen TN, Winther O, Brunak S,  
846 von Heijne G, Nielsen H. 2019. SignalP 5.0 improves signal peptide predictions using  
847 deep neural networks. *Nat Biotechnol* 37:420-423.
- 848 98. Eddy SR. 2011. Accelerated Profile HMM Searches. *PLoS Comput Biol* 7:e1002195.

849 99. Larkin MA, Blackshields G, Brown NP, Chenna R, McGettigan PA, McWilliam H,  
850 Valentin F, Wallace IM, Wilm A, Lopez R, Thompson JD, Gibson TJ, Higgins DG.  
851 2007. Clustal W and Clustal X version 2.0. *Bioinformatics* 23:2947-8.

852

853

854

855

856

857

858

859

860

861

862

863

864

865

866



867

868 **Tables:**

869 **Table 1:** Metagenome sampling information and number of retrieved metagenome assembled  
870 genomes (MAG).

| Sample                | Sample type                            | Bone type, organism                             | Collection dates                                     | Sampling location (GPS)                                    | High quality MAGs |
|-----------------------|----------------------------------------|-------------------------------------------------|------------------------------------------------------|------------------------------------------------------------|-------------------|
| A5<br>A9<br>A9n<br>B4 | <i>Osedax mucofloris</i>               | Femur, turkey<br>( <i>Meleagris gallopavo</i> ) | 08.01.2017<br>08.02.2017<br>08.02.2017<br>14.04.2017 | Byfjorden, Bergen,<br>Norway<br>(60,238185N;<br>5,181210E) | 15 (OB)           |
| D1<br>D2<br>I1<br>I3  | Bone surface<br>biofilm<br>communities | Tibia, cow<br>( <i>Bos taurus</i> )             | 02.2017<br>11.12.2017<br>27.01.2017<br>11.12.2017    |                                                            | 44 (BB)           |

871

872 **Table 2:** Taxonomic affiliation of MAGs according to Parks *et al.* (2018) and taxonomic novelty  
873 identified by RED (\*) (36).

| MAG  | Phylum            | Class                     | Order              | Family               | Genus            |
|------|-------------------|---------------------------|--------------------|----------------------|------------------|
| BB1  | Planctomycetota*  | -                         | -                  | -                    | -                |
| BB2  | Proteobacteria    | $\gamma$ -proteobacteria  | Beggiatoales*      | -                    | -                |
| BB3  | Proteobacteria    | $\gamma$ -proteobacteria  | Beggiatoales       | Beggiatoaceae*       | -                |
| BB4  | Proteobacteria    | $\gamma$ -proteobacteria* | -                  | -                    | -                |
| BB5  | Proteobacteria    | $\gamma$ -proteobacteria  | Enterobacteriales  | Alteromonadaceae     | Colwellia        |
| BB6  | Proteobacteria    | $\alpha$ -proteobacteria  | Rhizobiales*       | -                    | -                |
| BB7  | Spirochaetota     | Spirochaetia              | Spirochaetales     | Spirochaetaceae*     | -                |
| BB8  | Campylobacterota  | Camylobacteria            | Campylobacterales  | -                    | -                |
| BB9  | Campylobacterota  | Camylobacteria            | Campylobacterales  | Sulfurovaceae        | Sulfurovum       |
| BB10 | Campylobacterota  | Camylobacteria            | Campylobacterales  | Thiovulaceae*        | -                |
| BB11 | Campylobacterota  | Camylobacteria            | Campylobacterales  | Thiovulaceae         | Sulfurimonas     |
| BB12 | Fermentibacterota | Fermentibacteria          | Fermentibacterales | Fermentibacteraceae* | -                |
| BB13 | Desulfobacterota  | Desulfobulbia             | Desulfobulbales    | Desulfobulbaceae*    | -                |
| BB14 | Campylobacterota  | Camylobacteria            | Campylobacterales  | Sulfurovaceae*       | -                |
| BB15 | Campylobacterota  | Camylobacteria            | Campylobacterales  | Sulfurospirillaceae  | Sulfurospirillum |

|      |                    |                           |                    |                        |                     |
|------|--------------------|---------------------------|--------------------|------------------------|---------------------|
| BB16 | Proteobacteria     | $\gamma$ -proteobacteria  | Beggiatoales       | Beggiatoaceae          | Marithrix*          |
| BB17 | Bacteroidota       | Bacteroidia               | Flavobacteriales   | Ichthyobacteriaceae*   | -                   |
| BB18 | Krumholzbacteriota | Krumholzbacteria*         | -                  | -                      | -                   |
| BB19 | Proteobacteria     | $\gamma$ -proteobacteria  | Pseudomonadales    | Hahellaceae*           | -                   |
| BB20 | Proteobacteria     | $\gamma$ -proteobacteria  | Beggiatoales*      | -                      | -                   |
| BB21 | Desulfuromonadota  | Desulfuromonadia          | Desulfuromonadales | Geopsychrobacteraceae  | Desulfuromusa       |
| BB22 | Bacteroidota       | Bacteroidia               | Bacteroidales*     | -                      | -                   |
| BB23 | Bacteroidota       | Bacteroidia               | Flavobacteriales   | Flavobacteriaceae      | Winogradskyella     |
| BB24 | Bacteroidota       | Bacteroidia               | Flavobacteriales   | Flavobacteriaceae*     | -                   |
| BB25 | Desulfuromonadota  | Desulfuromonadia          | Desulfuromonadales | Geopsychrobacteraceae  | Desulfuromusa       |
| BB26 | Campylobacterota   | Camylobacteria            | Campylobacterales  | Thiovulaceae*          | -                   |
| BB27 | Desulfuromonadota  | Desulfuromonadia          | Desulfuromonadales | Geopsychrobacteraceae* | -                   |
| BB28 | Campylobacterota   | Camylobacteria            | Campylobacterales  | Arcobacteraceae*       | -                   |
| BB29 | Bacteroidota       | Bacteroidia               | Bacteroidales      | Marinifilaceae         | -                   |
| BB30 | Campylobacterota   | Camylobacteria            | Campylobacterales  | Arcobacteraceae        | Arcobacter          |
| BB31 | Proteobacteria     | $\gamma$ -proteobacteria  | Beggiatoales*      | -                      | -                   |
| BB32 | Proteobacteria     | $\gamma$ -proteobacteria  | Xanthomonadales    | Marinicellaceae*       | -                   |
| BB33 | Proteobacteria     | $\alpha$ -proteobacteria  | Rhodobacterales    | Rhodobacteraceae       | Lentibacter*        |
| BB34 | Proteobacteria     | $\gamma$ -proteobacteria* | -                  | -                      | -                   |
| BB35 | Bacteroidota       | Bacteroidia               | Flavobacteriales   | Flavobacteriaceae      | -                   |
| BB36 | Proteobacteria     | $\gamma$ -proteobacteria* |                    |                        |                     |
| BB37 | Proteobacteria     | $\gamma$ -proteobacteria  | Pseudomonadales    | Haliaceae*             | -                   |
| BB38 | Chloroflexota      | Anaerolineae              | Anearolineales*    | -                      | -                   |
| BB39 | Krumholzbacteriota | Krumholzbacteria*         | -                  | -                      | -                   |
| BB40 | Desulfobacterota   | Desulfobacteria           | Desulfobacterales  | Desulfobacteraceae     | -                   |
| BB41 | Campylobacterota   | Camylobacteria            | Campylobacterales  | Sulfurovaceae*         | -                   |
| BB42 | Bacteroidota       | Bacteroidia               | Flavobacteriales   | Flavobacteriaceae      | Maribacter*         |
| BB43 | Verrucomicrobiota  | Kiritimatiellae           | Kiritimatiellales* | -                      | -                   |
| BB44 | Proteobacteria     | $\gamma$ -proteobacteria  | Enterobacteriales  | Kangiellaceae*         | -                   |
| OB1  | Proteobacteria     | $\gamma$ -proteobacteria  | Pseudomonadales    | Nitrincolaceae         | Neptunomonas        |
| OB2  | Proteobacteria     | $\gamma$ -proteobacteria  | Pseudomonadales    | Nitrincolaceae         | Amphritea           |
| OB3  | Desulfobacterota   | Desulfovibrionia          | Desulfovibrionales | Desulfovibrionaceae    | Pseudodesulfovibrio |
| OB4  | Proteobacteria     | $\alpha$ -proteobacteria  | Sphingomonadales   | Emcibacteraceae*       | -                   |
| OB5  | Campylobacterota   | Camylobacteria            | Campylobacterales  | Thiovulaceae           | Sulfurimonas        |
| OB6  | Proteobacteria     | $\gamma$ -proteobacteria* | -                  | -                      | -                   |
| OB7  | Campylobacterota   | Camylobacteria            | Campylobacterales  | Arcobacteraceae        | Arcobacter          |
| OB8  | Campylobacterota   | Camylobacteria            | Campylobacterales  | Thiovulaceae           | Sulfurimonas        |
| OB9  | Proteobacteria     | $\alpha$ -proteobacteria  | Rhodobacterales    | Rhodobacteraceae       | -                   |
| OB10 | Verrucomicrobiota  | Kiritimatiellae           | Kiritimatiellales* | -                      | -                   |
| OB11 | Campylobacterota   | Camylobacteria            | Campylobacterales  | Sulfurospirillaceae    | Sulfurospirillum    |
| OB12 | Proteobacteria     | $\gamma$ -proteobacteria  | Enterobacteriales  | Kangiellaceae*         | -                   |
| OB13 | Bacteroidota       | Bacteroidia               | Bacteroidales      | Marinifilaceae         | Labilibaculum*      |
| OB14 | Desulfobacterota   | Desulfobacteria           | Desulfobacterales  | Desulfobacteraceae     | -                   |
| OB15 | Proteobacteria     | $\alpha$ -proteobacteria* | -                  | -                      | -                   |

874

## 875 **Figures**

876 **Figure 1:** Alluvial diagram of the taxonomic affiliation of all 59 obtained high quality MAGs,  
877 spanning 11 phyla, 14 classes, 19 orders and at least 23 families. 37 out of 59 MAGs were  
878 identified as taxonomically novel as determined by their relative evolutionary divergence (RED)  
879 to their closest common ancestor. The taxonomic affiliation was inferred with GTDBTk (36) and  
880 visualized with RAWGraphs (86).

881 **Figure 2:** Whole genome metabolic pathway comparison. Analysis was done with MEBS (37)  
882 and MAGs are phylogenetically grouped according to GTDBTk pipeline (36). The color  
883 gradients are explained next to the heatmaps. The heatmap shows the presence of marker genes  
884 or completeness of different metabolic systems within the MAGs.

885 **Figure 3:** Taxonomic relationship, gelatin hydrolysis analysis, SRB and SOB within the surface  
886 communities (Biofilm) and *Osedax* metagenomes. MAGs are displayed with the deepest  
887 taxonomic classification obtained. Bacterial clades predicted to encode the gelatin hydrolysis  
888 trait are depicted in green according to analysis with Traitair (39), SRB are encircled in blue and  
889 SOB in orange.

890 **Figure 4:** Presence of putative bone degrading enzymes in extracted MAGs. A) Abundance  
891 heatmap of the 12 investigated enzyme classes in the 59 high quality MAGs. The MAGs are  
892 arranged according to taxonomic affiliation. The absolute abundances of each enzyme class are  
893 depicted in the diagram on top of the heatmap. C) Percental distribution of all 722 identified  
894 enzymes according to their enzyme class.

895 **Figure 5:** Collagen utilization in MAG BB5. A) Gene cluster in BB5, comprising 15 genes for  
896 collagen utilization, each color-coded respective to its functional group: orange for collagen  
897 hydrolysis, blue for uptake and transport, green for proline (Pro) utilization, ocher for  
898 hydroxyproline (Hyp) utilization and brown for unknown function. A light box is indicative of a  
899 predicted signal-peptide for secretion. B) Metabolic prediction model for functional collagen  
900 utilization in *Colwellia* BB5. Arrows and genes are color coded in the same functional groups as  
901 in A. Gray dotted arrows indicate a connection to a major metabolic pathway. Intermediate  
902 abbreviations: P4C (1-pyrroline 4-hydroxy-2-carboxylate), KGSA (alpha-ketoglutarate  
903 semialdehyde), KG (alpha-ketoglutarate), P5C (1-pyrroline-5-carboxylate). Enzyme  
904 abbreviations: D-aa dHase (D-hydroxyproline dehydrogenase), dAminase (pyrroline-4-hydroxy-  
905 2-carboxylate deaminase), di-oxo dHase (KGSA dehydrogenase), P5CR/ornithine dAminase  
906 (bifunctional 1-pyrroline-5-carboxylate reductase/ornithine cyclodeaminase), PRODH (proline  
907 dehydrogenase), P5CDH (pyrroline-5-carboxylate dehydrogenase).

908 **Figure 6:** Conservation between M9 collagen degradation gene clusters in *Colwellia*  
909 *psychrerythraea* GAB14E, *Colwellia piezophila* ATCC BAA-637 and the MAG *Colwellia* BB5  
910 drawn at scale. dHase, dehydrogenase; PPIase, peptidyl-prolyl cis trans isomerase; Hyp, D-aa,  
911 dAminase etc. Color coding and gene names are indicated.

912 **Figure 7:** Hypothesis of the interplay in the marine bone microbiome and degradome. (I) Sulfur-  
913 oxidizing bacteria (SOB, shown with a halo) convert elemental sulfur and H<sub>2</sub>S into sulfate and  
914 protons that lead to an acidification and therefore bone demineralization. (II) Sulfate reducing  
915 (SRB, green) and sulfur disproportioning bacteria produce H<sub>2</sub>S from sulfate. (III)  
916 Enterobacterales and other especially  $\gamma$ -proteobacteria secrete collagenases to degrade collagen.  
917 (IV) Bacteroidia and other bacteria secrete glycosidases and other enzymes to hydrolyze the

918 organic bone components (glycosides, esters, lipids). This exemplifies a bone demineralization  
919 loop that fuels itself as long as sulfur is available and degrades the organic bone components in  
920 the process.

921

922

923

924

925

926

927

928

929

930

931

932

933

934

935

936

937 **Supplementary material**

938 **Supplementary tables**

939 **Supplementary table S1: MAG sequence data. All MAGs labeled ‘OB’ were retrieved from**

940 **Osedax samples and all MAGs labeled with ‘BB’ from bone surface biofilms.**

| <b>MAG</b> | <b>Genome size [Mbp]</b> | <b>Longest contig</b> | <b>N50</b> | <b>No. of contigs</b> | <b>Predicted genes</b> | <b>GC content</b> | <b>No. of bone-degrading Enzymes</b> |
|------------|--------------------------|-----------------------|------------|-----------------------|------------------------|-------------------|--------------------------------------|
| BB_1       | 4.68                     | 155 kbp               | 429 kbp    | 38                    | 3723                   | 44.50%            | 24                                   |
| BB_2       | 4.18                     | 853 kbp               | 248 kbp    | 108                   | 3538                   | 44.10%            | 13                                   |
| BB_3       | 4.65                     | 75 kbp                | 23 kbp     | 362                   | 4126                   | 37.70%            | 11                                   |
| BB_4       | 5.18                     | 1.05 Mbp              | 198 kbp    | 68                    | 4705                   | 38.80%            | 13                                   |
| BB_5       | 3.26                     | 82 kbp                | 13 kbp     | 395                   | 3018                   | 36.10%            | 16                                   |
| BB_6       | 2.77                     | 72 kbp                | 19 kbp     | 244                   | 2783                   | 40.10%            | 10                                   |
| BB_7       | 4.87                     | 78 kbp                | 15 kbp     | 489                   | 4636                   | 40.10%            | 22                                   |
| BB_8       | 3.08                     | 89 kbp                | 18 kbp     | 413                   | 3332                   | 32.90%            | 11                                   |
| BB_9       | 2.16                     | 126 kbp               | 36 kbp     | 159                   | 2259                   | 36.80%            | 5                                    |
| BB_10      | 3.01                     | 137 kbp               | 35 kbp     | 142                   | 2950                   | 36.20%            | 11                                   |
| BB_11      | 2.39                     | 21 kbp                | 3 kbp      | 809                   | 2958                   | 35.40%            | 6                                    |
| BB_12      | 3.24                     | 329 kbp               | 141 kbp    | 127                   | 2929                   | 45.10%            | 10                                   |
| BB_13      | 4.24                     | 16 kbp                | 3 kbp      | 1688                  | 4778                   | 48%               | 16                                   |
| BB_14      | 2.32                     | 74 kbp                | 33 kbp     | 103                   | 2265                   | 34.20%            | 8                                    |
| BB_15      | 2.68                     | 415 kbp               | 191 kbp    | 33                    | 2695                   | 30.70%            | 5                                    |
| BB_16      | 3.09                     | 481 kbp               | 237 kbp    | 22                    | 2867                   | 34.10%            | 13                                   |
| BB_17      | 3.64                     | 81 kbp                | 16 kbp     | 327                   | 3171                   | 32.30%            | 13                                   |
| BB_18      | 4.43                     | 267 kbp               | 114 kbp    | 176                   | 3652                   | 52.60%            | 23                                   |
| BB_19      | 4.07                     | 273 kbp               | 132 kbp    | 88                    | 3778                   | 41.30%            | 13                                   |
| BB_20      | 4.49                     | 73 kbp                | 19 kbp     | 338                   | 3725                   | 37.90%            | 13                                   |
| BB_21      | 2.89                     | 145 kbp               | 51 kbp     | 186                   | 2812                   | 44.40%            | 8                                    |
| BB_22      | 5.23                     | 124 kbp               | 28 kbp     | 294                   | 4210                   | 34.20%            | 32                                   |
| BB_23      | 3.72                     | 128 kbp               | 30 kbp     | 190                   | 3427                   | 23.40%            | 9                                    |
| BB_24      | 4.64                     | 57 kbp                | 16 kbp     | 582                   | 4438                   | 31.30%            | 58                                   |
| BB_25      | 3.31                     | 211 kbp               | 67 kbp     | 118                   | 3069                   | 44.30%            | 8                                    |
| BB_26      | 3.59                     | 77 kbp                | 23 kbp     | 242                   | 3547                   | 44.60%            | 8                                    |
| BB_27      | 2.58                     | 39 kbp                | 9 kbp      | 514                   | 2602                   | 43.10%            | 9                                    |

|       |      |          |          |      |      |        |    |
|-------|------|----------|----------|------|------|--------|----|
| BB_28 | 3.02 | 103 kbp  | 27 kbp   | 187  | 3056 | 26.30% | 4  |
| BB_29 | 4.16 | 122 kbp  | 21 kbp   | 304  | 3375 | 34.40% | 21 |
| BB_30 | 1.99 | 35 kbp   | 9 kbp    | 292  | 2109 | 25.80% | 4  |
| BB_31 | 5.34 | 141 kbp  | 35 kbp   | 263  | 4342 | 45.30% | 15 |
| BB_32 | 3.62 | 326 kbp  | 117 kbp  | 52   | 3061 | 35.20% | 14 |
| BB_33 | 3.25 | 137 kbp  | 77 kbp   | 74   | 3319 | 56.80% | 9  |
| BB_34 | 4.87 | 115 kbp  | 31 kbp   | 302  | 4339 | 38.20% | 9  |
| BB_35 | 3.13 | 1.08 Mbp | 834 kbp  | 7    | 2773 | 31.80% | 12 |
| BB_36 | 4.29 | 149 kbp  | 54 kbp   | 138  | 3907 | 39.10% | 9  |
| BB_37 | 3.94 | 120 kbp  | 29 kbp   | 353  | 3831 | 51.50% | 11 |
| BB_38 | 3.62 | 242 kbp  | 62 kbp   | 144  | 3260 | 44.20% | 14 |
| BB_39 | 4.06 | 50 kbp   | 7 kbp    | 814  | 3832 | 59.10% | 17 |
| BB_40 | 6.73 | 296 kbp  | 113kbp   | 106  | 5886 | 45.10% | 0  |
| BB_41 | 2.54 | 64 kbp   | 13 kbp   | 288  | 2631 | 32.90% | 7  |
| BB_42 | 3.59 | 118 kbp  | 30 kbp   | 186  | 3352 | 33.10% | 23 |
| BB_43 | 3.69 | 317 kbp  | 19 kbp   | 330  | 3767 | 49.10% | 10 |
| BB_44 | 4.03 | 21 kbp   | 5 kbp    | 985  | 4077 | 40.20% | 17 |
| OB_1  | 4.21 | 150 kbp  | 53 kbp   | 143  | 3949 | 43.10% | 13 |
| OB_2  | 4.15 | 563 kbp  | 111 kbp  | 53   | 3804 | 47.20% | 14 |
| OB_3  | 3.96 | 2.09 Mbp | 2.09 Mbp | 150  | 3665 | 48.70% | 16 |
| OB_4  | 2.73 | 66.9 kbp | 15 kbp   | 778  | 2962 | 38.90% | 4  |
| OB_5  | 2.05 | 107 kbp  | 50 kbp   | 81   | 2113 | 31.90% | 5  |
| OB_6  | 3.88 | 180 kbp  | 68 kbp   | 100  | 3643 | 39.10% | 11 |
| OB_7  | 1.78 | 24 kbp   | 5 kbp    | 586  | 1916 | 26.10% | 2  |
| OB_8  | 2.92 | 106 kbp  | 17 kbp   | 269  | 3159 | 31.60% | 7  |
| OB_9  | 3.13 | 432 kbp  | 190 kbp  | 55   | 3181 | 55.10% | 6  |
| OB_10 | 3    | 55 kbp   | 14 kbp   | 316  | 2910 | 48.60% | 10 |
| OB_11 | 2.69 | 324 kbp  | 101 kbp  | 212  | 2676 | 30.50% | 5  |
| OB_12 | 4.68 | 59 kbp   | 21 kbp   | 361  | 4128 | 39.90% | 22 |
| OB_13 | 6.74 | 32 kbp   | 7 kbp    | 1266 | 5928 | 34.40% | 82 |
| OB_14 | 6.81 | 436 kbp  | 121 kbp  | 365  | 6165 | 44.90% | 17 |
| OB_15 | 2.25 | 20 kbp   | 4 kbp    | 800  | 2345 | 36.10% | 13 |

941

942

943

944

945 **Supplementary table S2:** Distribution of potential genes in involved in acidification. SPI refers  
 946 to Sec type signal peptides and SPII is used for lipoprotein signal peptides according to SignalP  
 947 (97).

| <b>MAG</b> | <b>P-type ATPase</b> | <b>Lactate dehydrogenase</b> | <b>Carbonic anhydrase</b> |
|------------|----------------------|------------------------------|---------------------------|
| BB_1       | 1                    | 1                            | 2                         |
| BB_2       | 8                    | 0                            | 2 (1x SPI)                |
| BB_3       | 13                   | 1                            | 2 (1x SPI)                |
| BB_4       | 12                   | 0                            | 5 (1x SPI)                |
| BB_5       | 2                    | 1                            | 2                         |
| BB_6       | 2                    | 2                            | 2                         |
| BB_7       | 2                    | 0                            | 1                         |
| BB_8       | 3                    | 0                            | 3 (1x SPI, 1x SPII)       |
| BB_9       | 1                    | 1                            | 0                         |
| BB_10      | 2                    | 0                            | 3 (1x SPII)               |
| BB_11      | 2                    | 0                            | 1 (1x SPII)               |
| BB_12      | 0                    | 0                            | 0                         |
| BB_13      | 8                    | 0                            | 2 (1x SPI)                |
| BB_14      | 1                    | 0                            | 2 (1x SPI)                |
| BB_15      | 4                    | 0                            | 1                         |
| BB_16      | 14                   | 0                            | 3 (1xSPII)                |
| BB_17      | 1                    | 1                            | 1                         |
| BB_18      | 0                    | 1                            | 1                         |
| BB_19      | 2                    | 0                            | 2                         |
| BB_20      | 14                   | 2                            | 3 (1x SPI)                |
| BB_21      | 2                    | 0                            | 1                         |
| BB_22      | 1                    | 1                            | 1                         |
| BB_23      | 3                    | 0                            | 1                         |
| BB_24      | 2                    | 0                            | 2                         |
| BB_25      | 1                    | 0                            | 1                         |
| BB_26      | 2                    | 1                            | 3 (2x SPI)                |
| BB_27      | 0                    | 0                            | 1                         |
| BB_28      | 4                    | 0                            | 1                         |
| BB_29      | 1                    | 1                            | 1                         |
| BB_30      | 1                    | 0                            | 2 (1x SPI)                |
| BB_31      | 7                    | 0                            | 2                         |
| BB_32      | 1                    | 0                            | 1                         |
| BB_33      | 2                    | 3                            | 1                         |



|       |    |   |            |
|-------|----|---|------------|
| BB_34 | 15 | 0 | 5 (1x SPI) |
| BB_35 | 1  | 1 | 2          |
| BB_36 | 13 | 0 | 3 (1x SPI) |
| BB_37 | 3  | 1 | 2          |
| BB_38 | 1  | 2 | 0          |
| BB_39 | 0  | 0 | 1          |
| BB_40 | 3  | 1 | 0          |
| BB_41 | 2  | 0 | 3 (1x SPI) |
| BB_42 | 1  | 2 | 1          |
| BB_43 | 1  | 0 | 1          |
| BB_44 | 1  | 0 | 2          |
| OB_1  | 3  | 1 | 3          |
| OB_2  | 3  | 0 | 3          |
| OB_3  | 1  | 1 | 0          |
| OB_4  | 1  | 0 | 1          |
| OB_5  | 1  | 0 | 0          |
| OB_6  | 1  | 0 | 2          |
| OB_7  | 1  | 0 | 2 (1x SPI) |
| OB_8  | 4  | 1 | 1          |
| OB_9  | 2  | 3 | 1          |
| OB_10 | 2  | 0 | 1          |
| OB_11 | 4  | 0 | 1          |
| OB_12 | 1  | 0 | 2          |
| OB_13 | 0  | 1 | 0          |
| OB_14 | 5  | 2 | 0          |
| OB_15 | 2  | 3 | 1          |

948

949

950

951

952

953

954

955 **Supplementary table S3: *Colwellia* genomes used in this study for comparison to MAG BB5.**

| <b>Name</b>                                 | <b>NCBI BioProject accession number</b> | <b>Isolation source</b>                    | <b>Number of M9 collagenases</b> |
|---------------------------------------------|-----------------------------------------|--------------------------------------------|----------------------------------|
| <i>Colwellia piezophila</i>                 | PRJNA182419                             | Deep-sea sediment                          | 2                                |
| <i>Colwellia psychrerythraea</i>            | PRJNA258170                             | <i>Terua</i> mussel                        | 11                               |
| <i>Colwellia hornerae</i>                   | PRJNA516280                             | Arctic sea ice                             | 0                                |
| <i>Colwellia demingiae</i>                  | PRJNA516284                             | Arctic sea ice                             | 1                                |
| Candidatus <i>Colwellia aromaticivorans</i> | PRJNA478776                             | Microcosm experiments with oil in seawater | 0                                |
| <i>Colwellia echini</i>                     | PRJNA420580                             | Sea urchin                                 | 0                                |
| <i>Colwellia beringensis</i>                | PRJNA378583                             | Marine sediment, Bering Sea                | 1                                |
| <i>Colwellia agarivorans</i>                | PRJNA371543                             | Coastal sea water                          | 0                                |
| <i>Colwellia marinimaniae</i>               | PRJDB5767                               | Amphipod from Challenger Deep              | 4                                |
| <i>Colwellia sediminilitoris</i>            | PRJNA381102                             | Tidal flat, South Sea, South Korea         | 0                                |
| <i>Colwellia polaris</i>                    | PRJNA380006                             | Arctic sea ice                             | 0                                |
| <i>Colwellia mytili</i>                     | PRJNA381102                             | Mussel <i>Mytilus edulis</i>               | 2                                |
| <i>Colwellia aestuarii</i>                  | PRJNA371561                             | Tidal flat Korea                           | 0                                |
| <i>Colwellia chukchiensis</i>               | PRJNA380006                             | Arctic ocean                               | 1                                |

956

957

958

959

960

961

962

963

964

965 **Supplementary figures**

966 **Supplementary figure S1:** A) ROV image of bone incubation experiment in the Byfjorden at 68  
967 m depth, shown is a cow tibia. B) Bones retrieved from the Byfjorden after nine months of  
968 incubation, bacterial mats and blackening at the epiphysis can be seen.

969 **Supplementary figure S2:** SSU rRNA gene profiling of bone surface biofilms and *Osedax*  
970 metagenomes. Figures have been adapted from phyloFlash (79). A) Heatmap of most prominent  
971 bacterial orders in the investigated metagenomes in respect to percental abundance. B) Barplot of  
972 present taxa in the both sample types.

973 **Supplementary figure S3:** Maximum-likelihood tree of all 94 obtained carbonic anhydrases and  
974 relevant reference sequences from Capasso *et al.*, 2015 (40).

975 **Supplementary figure S4:** Genomic context of all identified M9 collagenase in the investigated  
976 MAGs. M9 collagenases are encircled in red, all genes potentially involved in collagen/proline  
977 utilization pathways are encircled in green. The graphic was made with SnapGene software  
978 (from GSL Biotech; available at [snapgene.com](http://snapgene.com)).

979

980

981

982

983

984

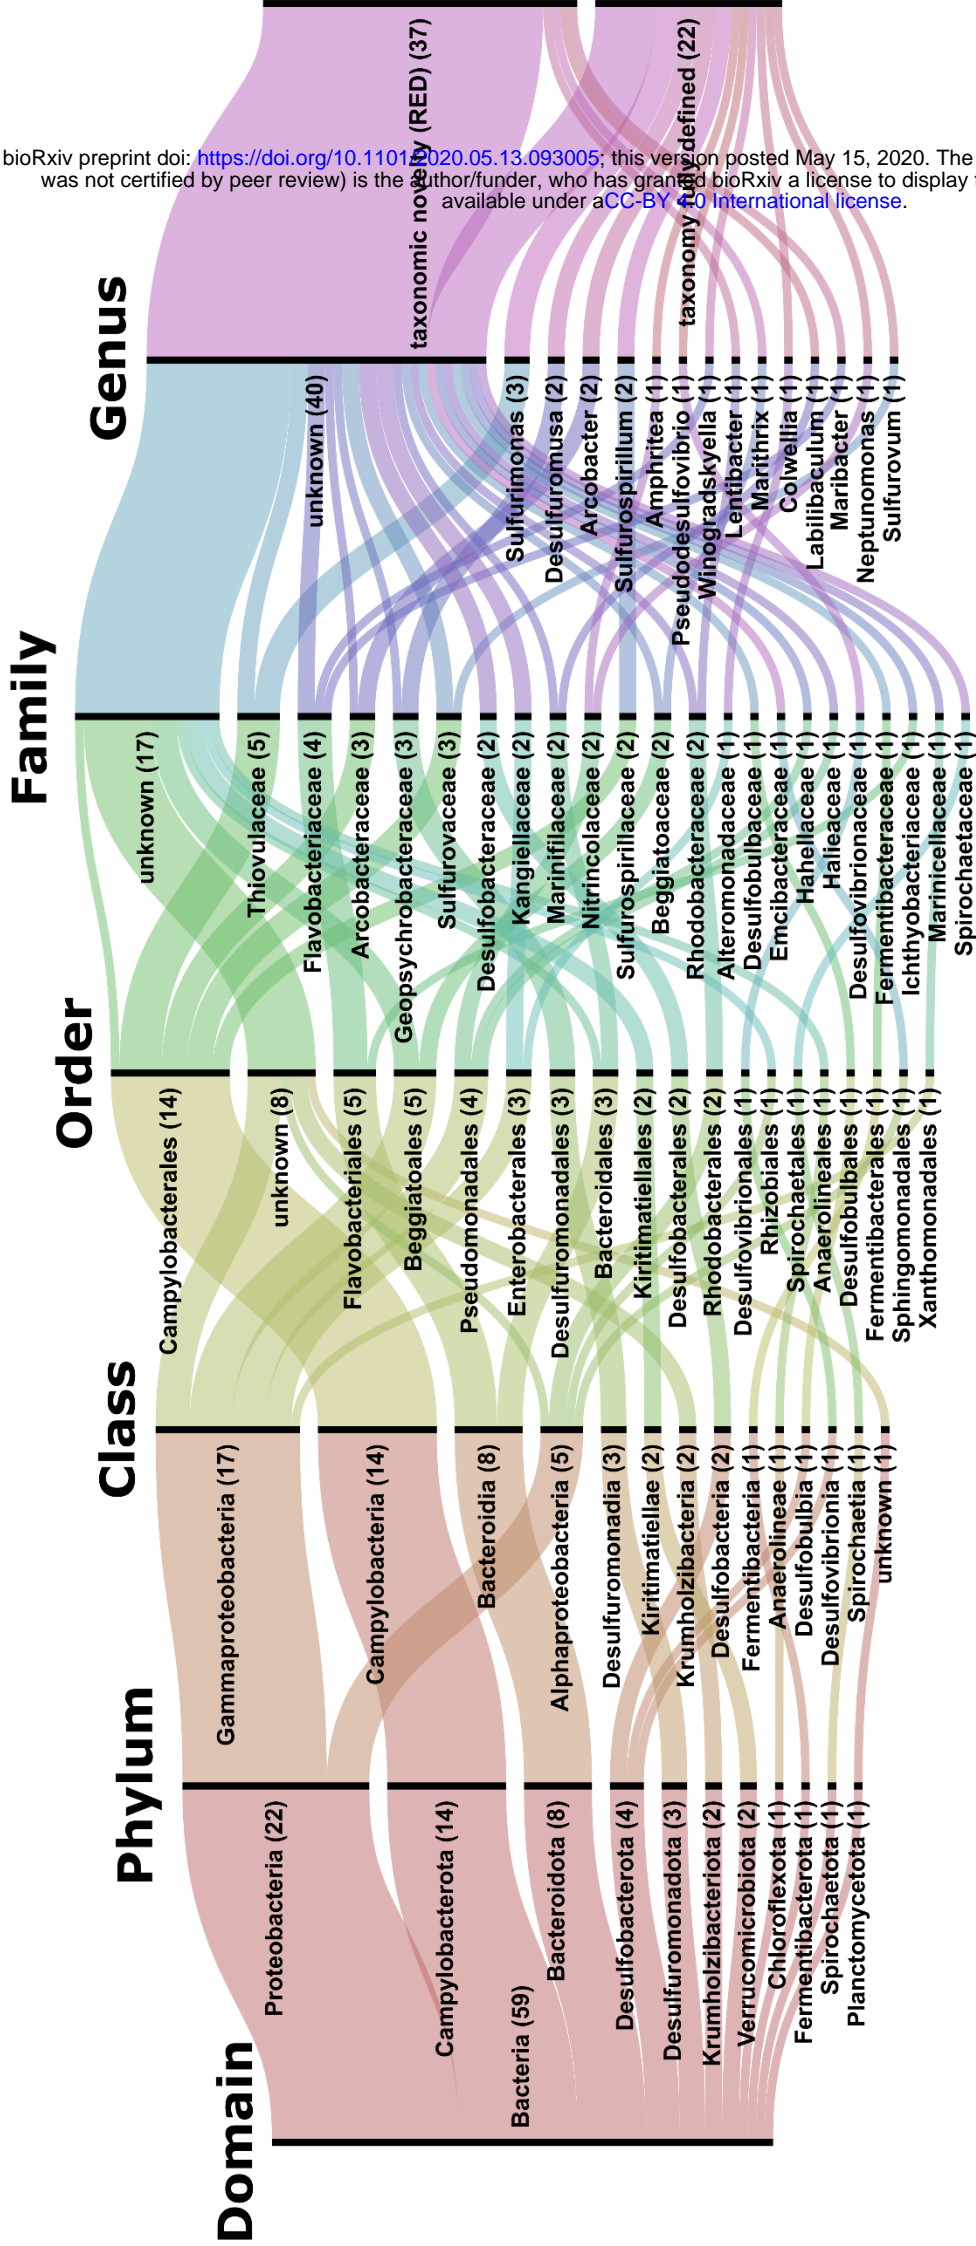

**Figure 1:** Alluvial diagram of the taxonomic affiliation of all 59 obtained high quality MAGs, spanning 11 phyla, 14 classes, 19 orders and at least 63 families. 37 out of 59 MAGs were identified as taxonomically novel as determined by their relative evolutionary divergence (RED) to their closest common ancestor. The taxonomic affiliation was inferred with GTDBTk (36) and visualized with RAWGraphs (86).

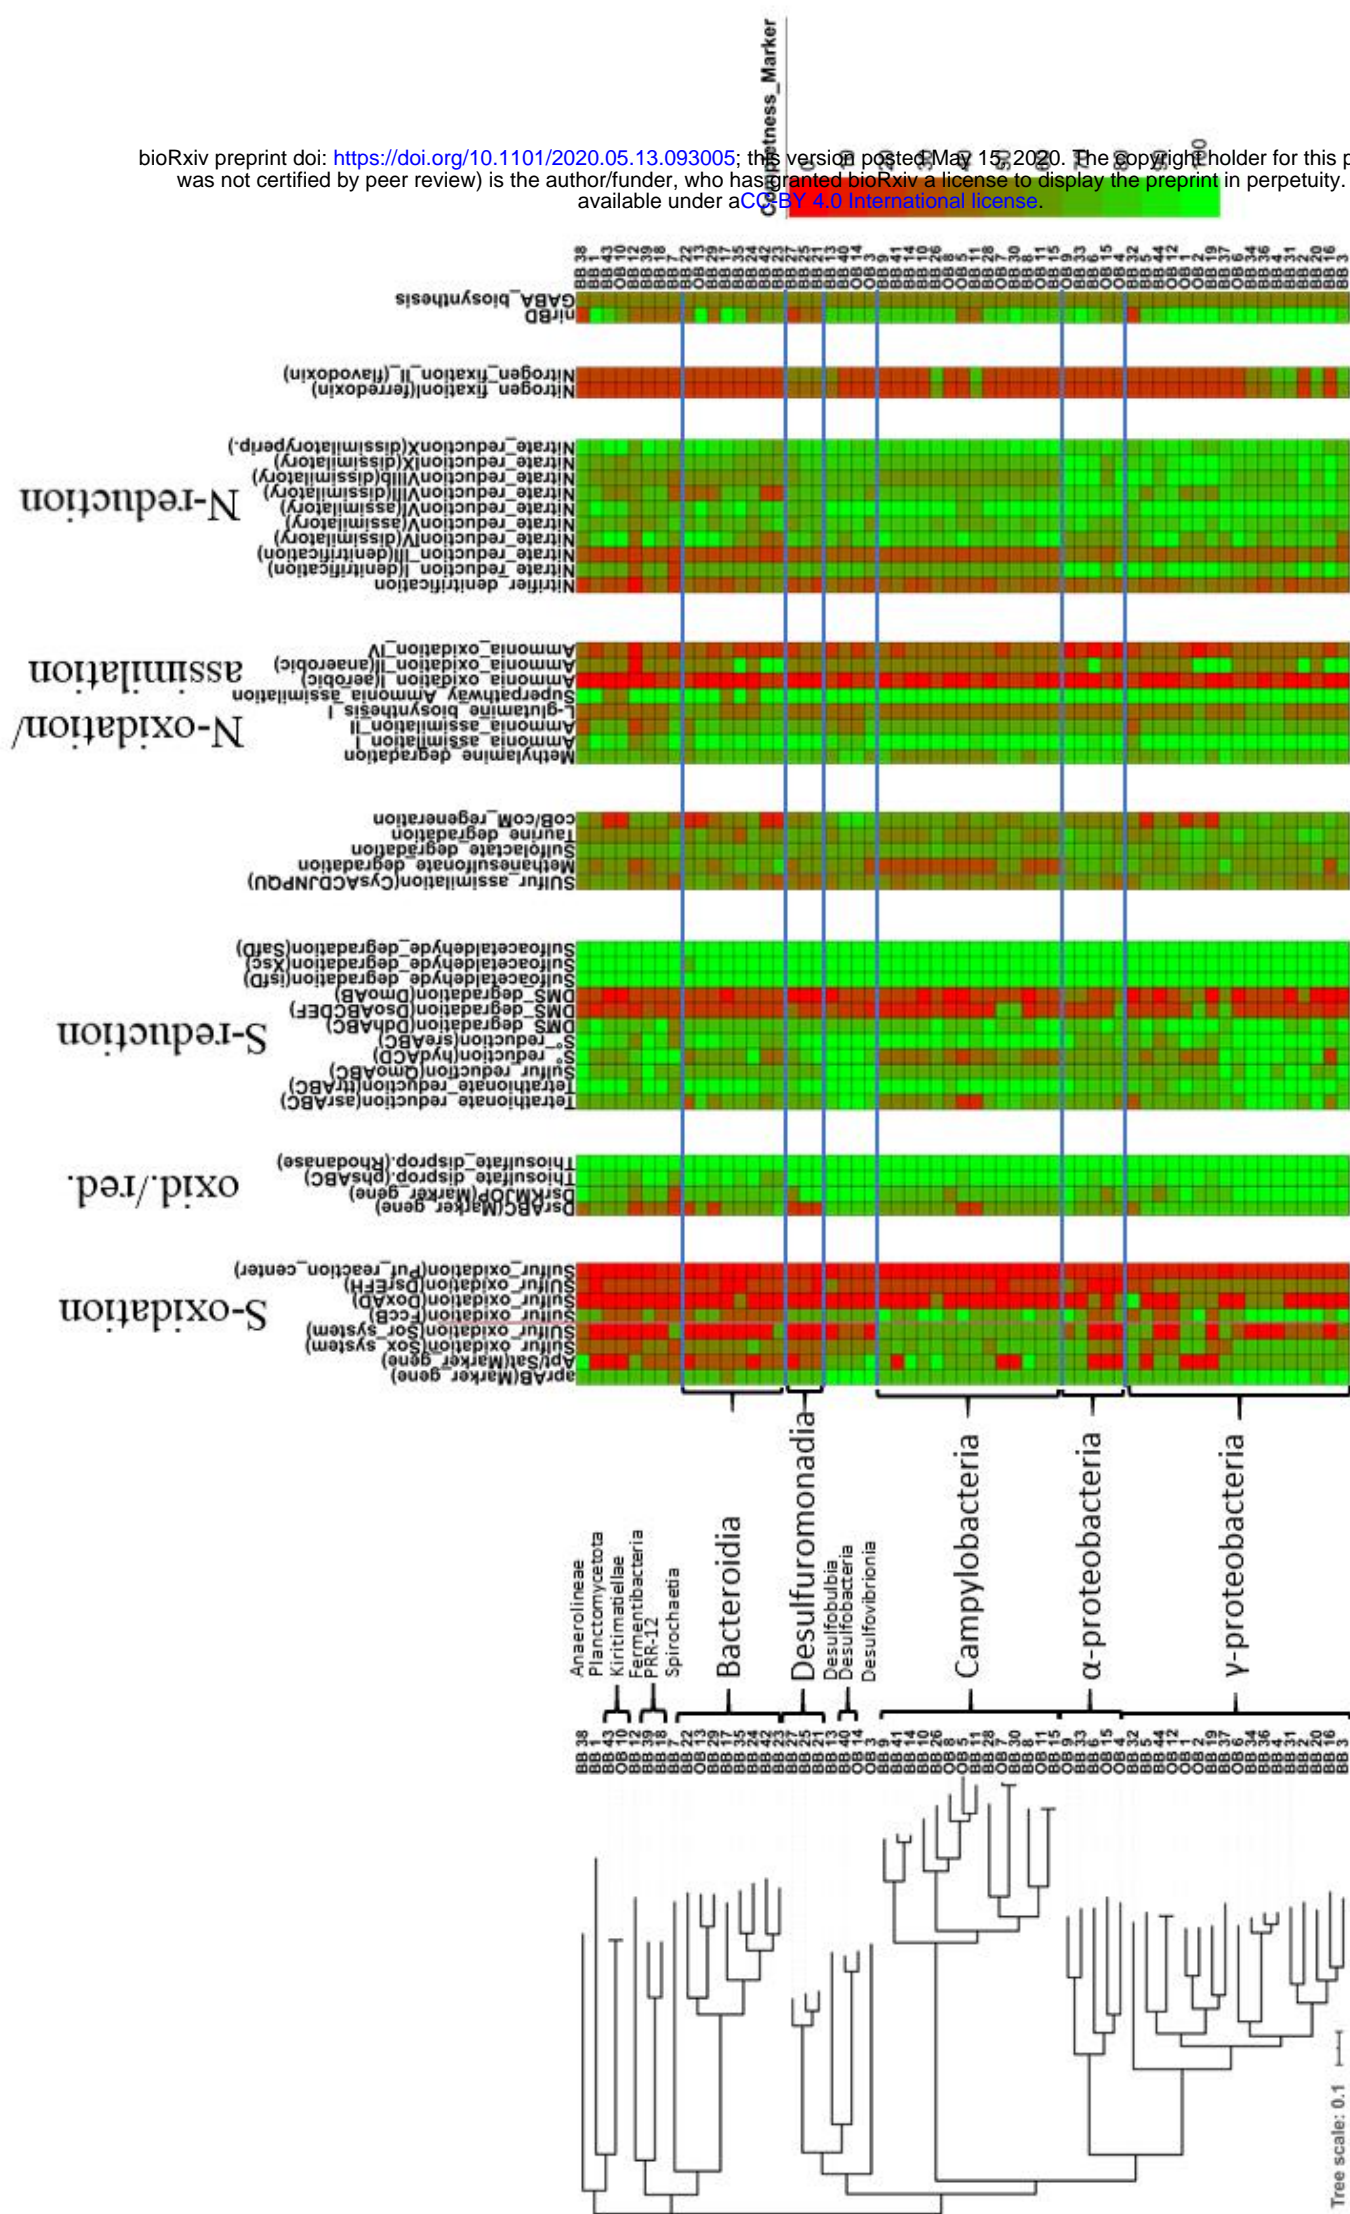

**Figure 2:** Whole genome metabolic pathway comparison. Analysis was done with MEBS (37) and MAGs are phylogenetically grouped according to GTDBTk pipeline (36). The color gradients are explained next to the heatmaps. The heatmap shows the presence of marker genes or completeness of different metabolic systems within the MAGs.

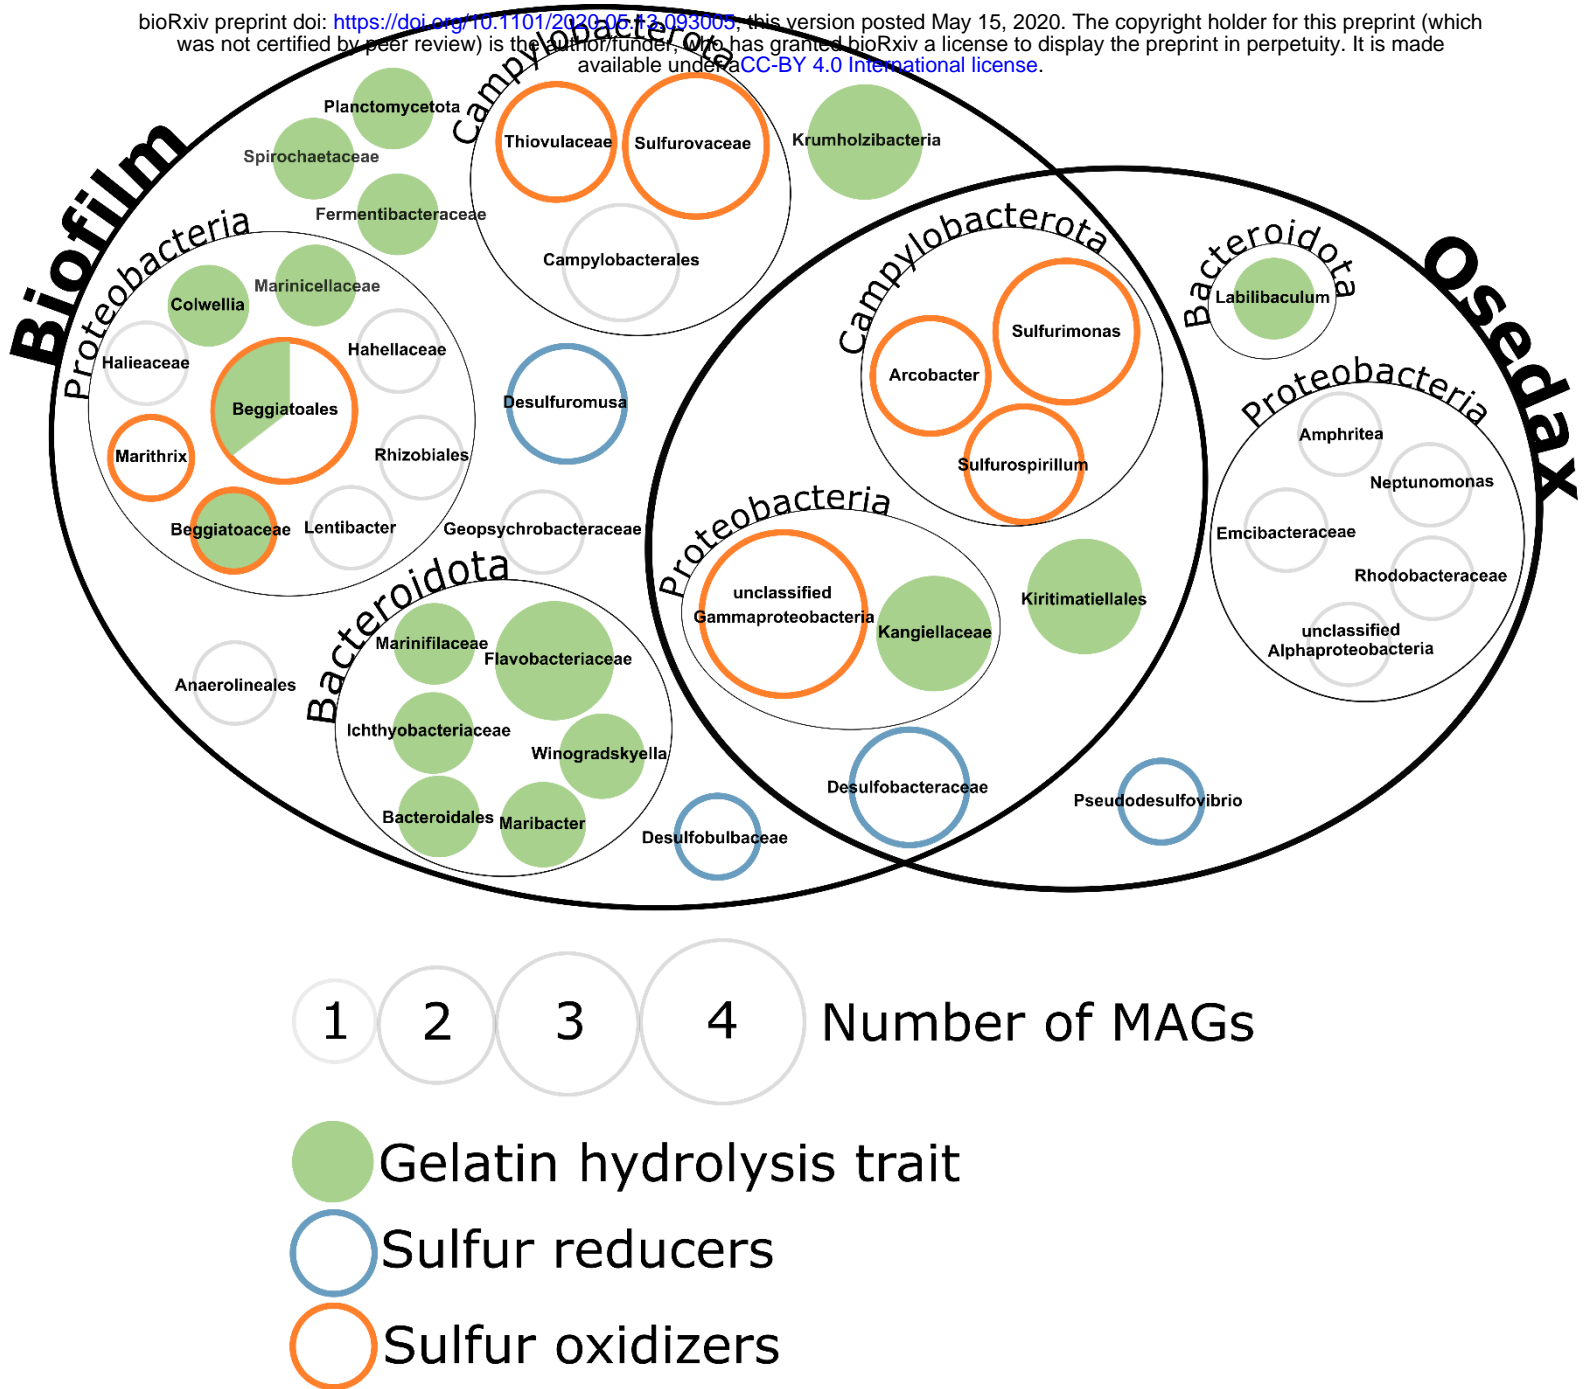

**Figure 3:** Taxonomic relationship, gelatin hydrolysis analysis, SRB and SOB within the surface communities (Biofilm) and *Osedax* metagenomes. MAGs are displayed with the deepest taxonomic classification obtained. Bacterial clades predicted to encode the gelatin hydrolysis trait are depicted in green according to analysis with Traitar (39), SRB are encircled in blue and SOB in orange.

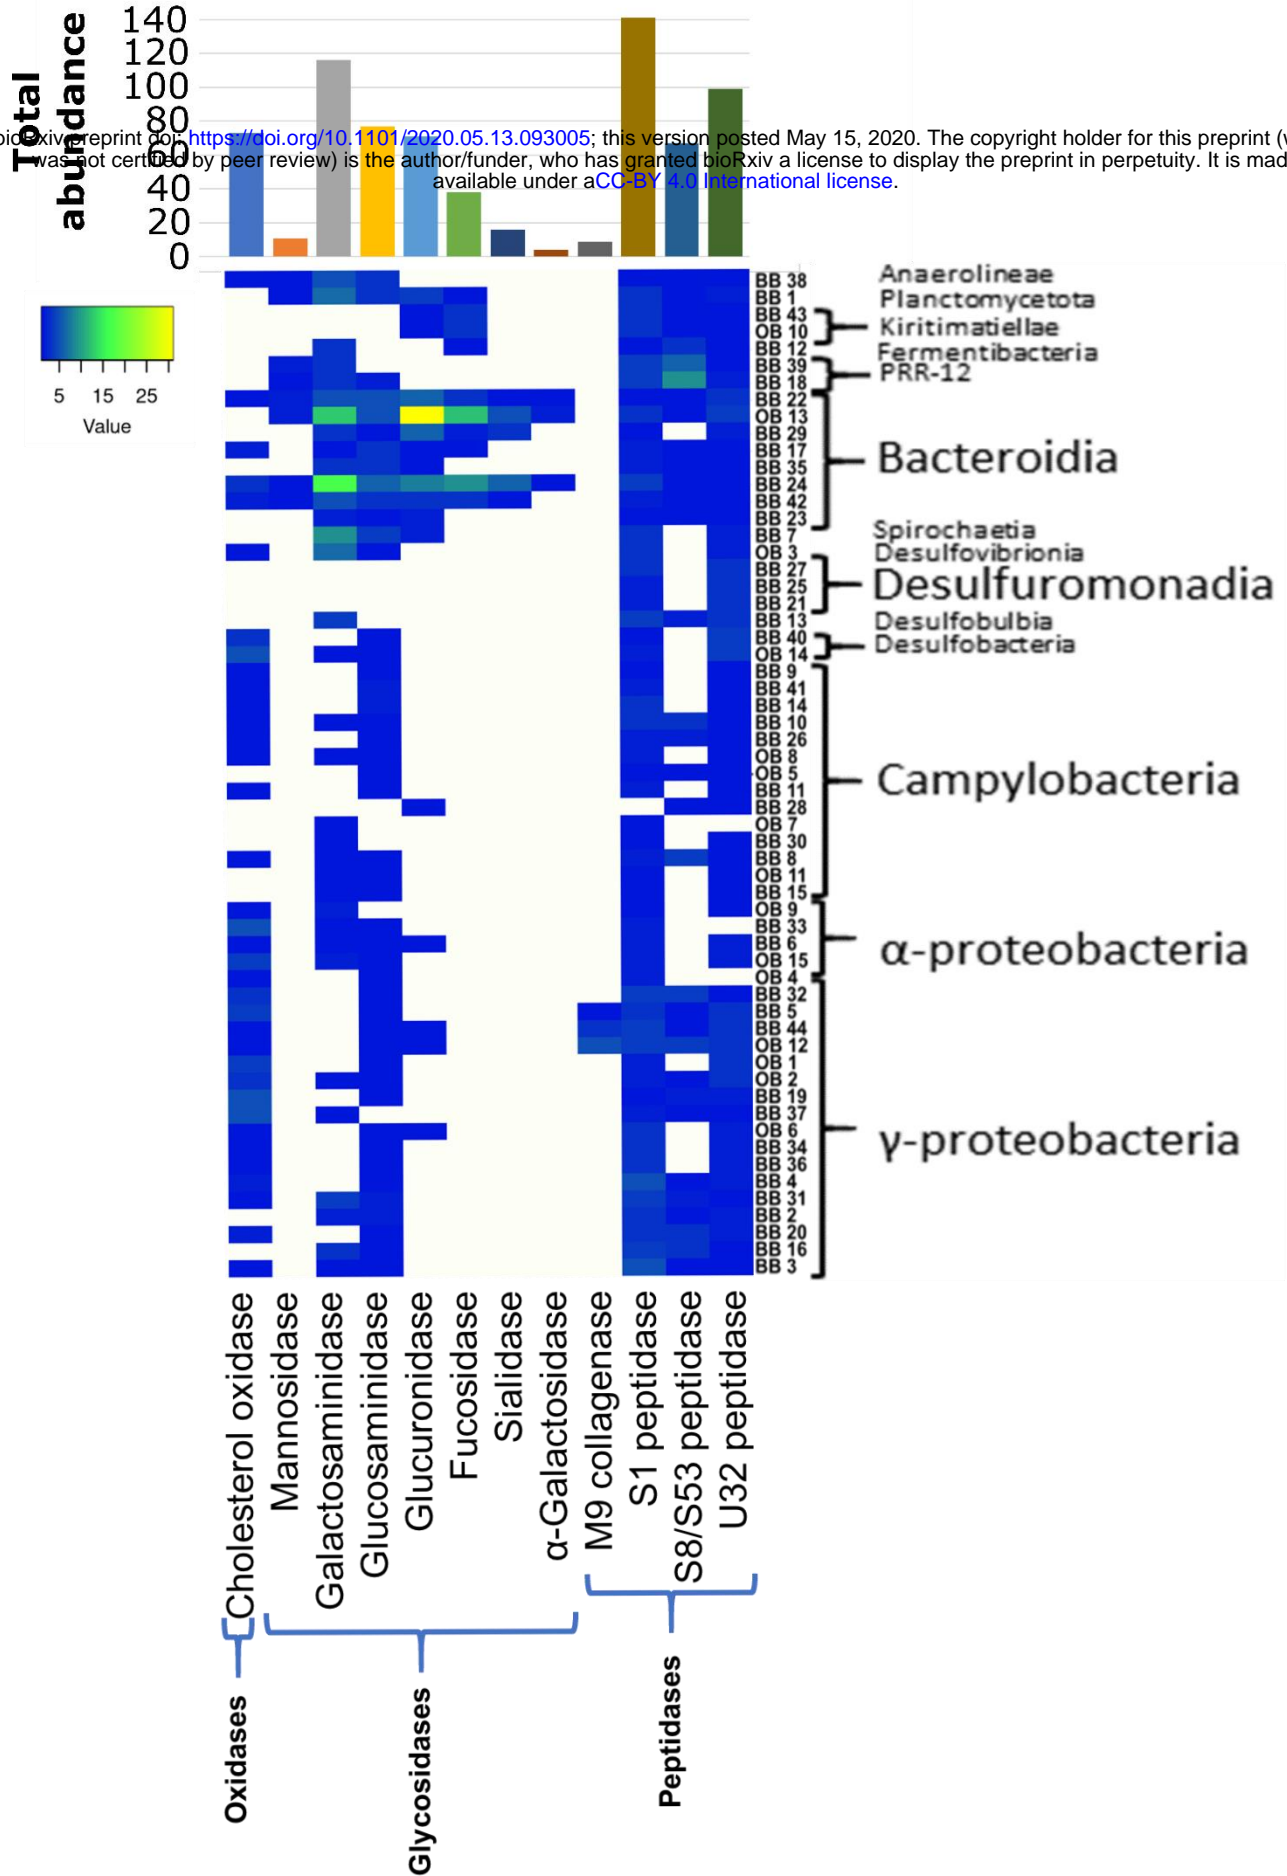

**Figure 4:** Presence of putative bone degrading enzymes in extracted MAGs. A) Abundance heatmap of the 12 investigated enzyme classes in the 59 high quality MAGs. The MAGs are arranged according to taxonomic affiliation. The absolute abundances of each enzyme class are depicted in the diagram on top of the heatmap. C) Percentual distribution of all 722 identified enzymes according to their enzyme class.

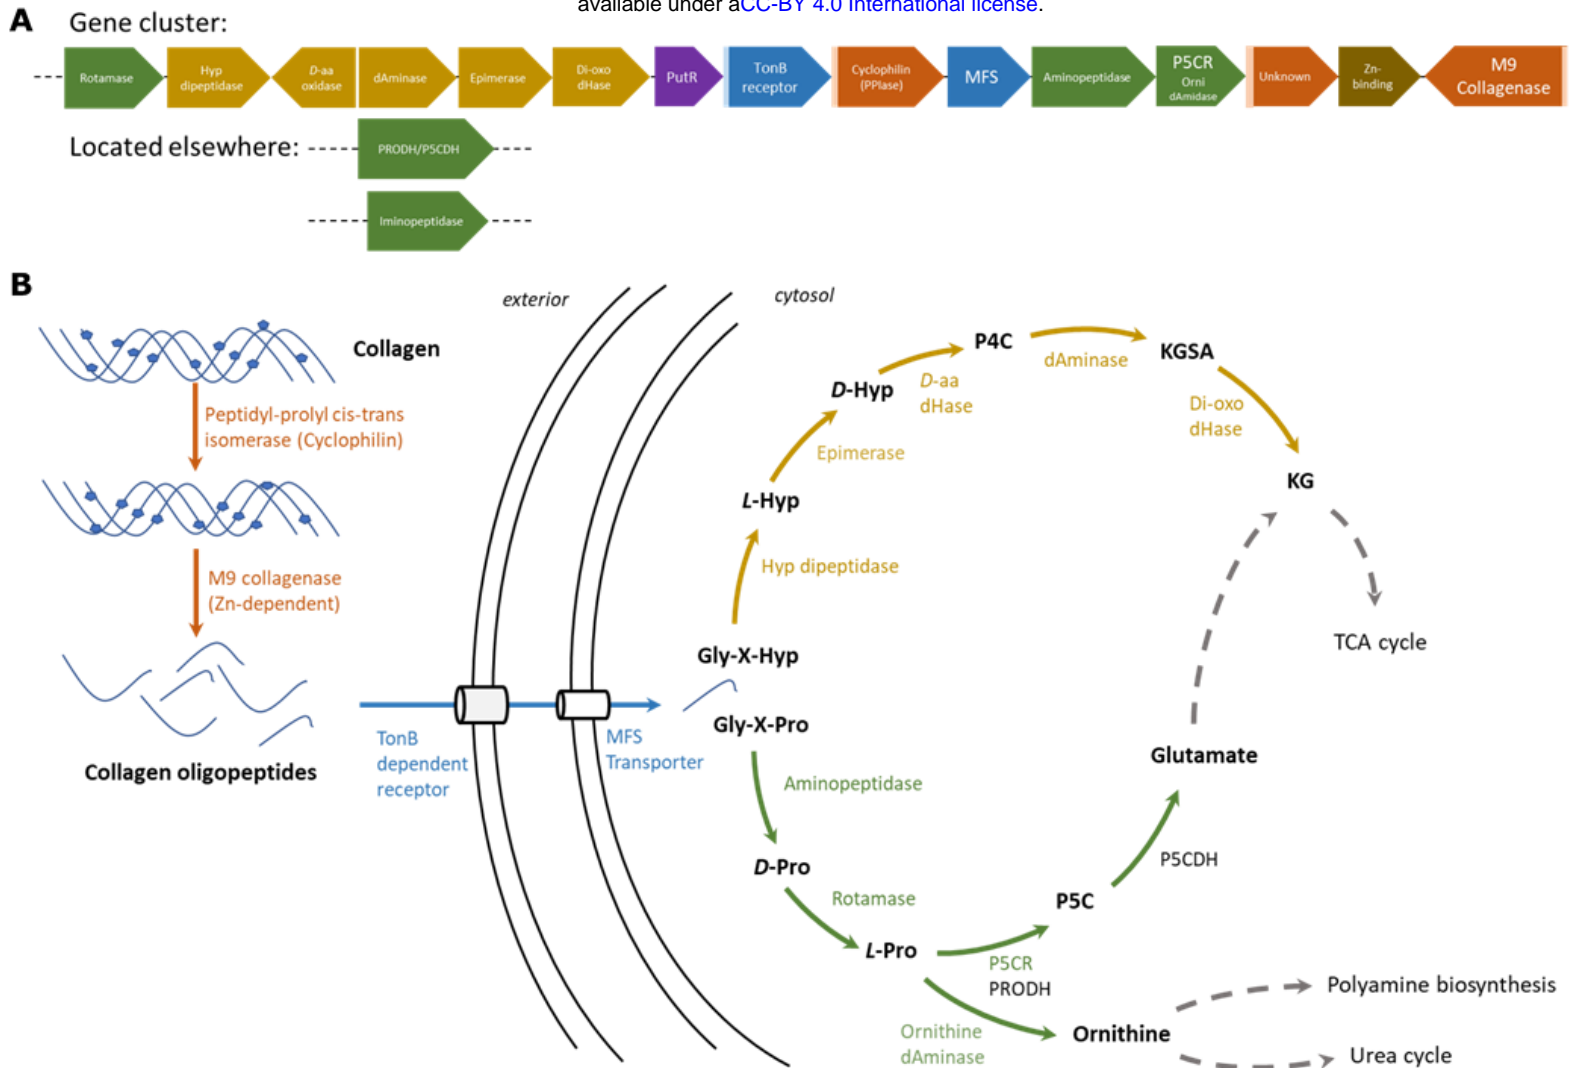

**Figure 5:** Collagen utilization in MAG BB5. A) Gene cluster in BB5, comprising 15 genes for collagen utilization, each color-coded respective to its functional group: orange for collagen hydrolysis, blue for uptake and transport, green for proline (Pro) utilization, ocher for hydroxyproline (Hyp) utilization and brown for unknown function. A light box is indicative of a predicted signal-peptide for secretion. B) Metabolic prediction model for functional collagen utilization in *Colwellia* BB5. Arrows and genes are color coded in the same functional groups as in A. Gray dotted arrows indicate a connection to a major metabolic pathway. Intermediate abbreviations: P4C (1-pyrroline 4-hydroxy-2-carboxylate), KGSA (alpha-ketoglutarate semialdehyde), KG (alpha-ketoglutarate), P5C (1-pyrroline-5-carboxylate). Enzyme abbreviations: D-aa dHase (D-hydroxyproline dehydrogenase), dAminase (pyrroline-4-hydroxy-2-carboxylate deaminase), di-oxo dHase (KGSA dehydrogenase), P5CR/ornithine dAminase (bifunctional 1-pyrroline-5-carboxylate reductase/ornithine cyclodeaminase), PRODH (proline dehydrogenase), P5CDH (pyrroline-5-carboxylate dehydrogenase).



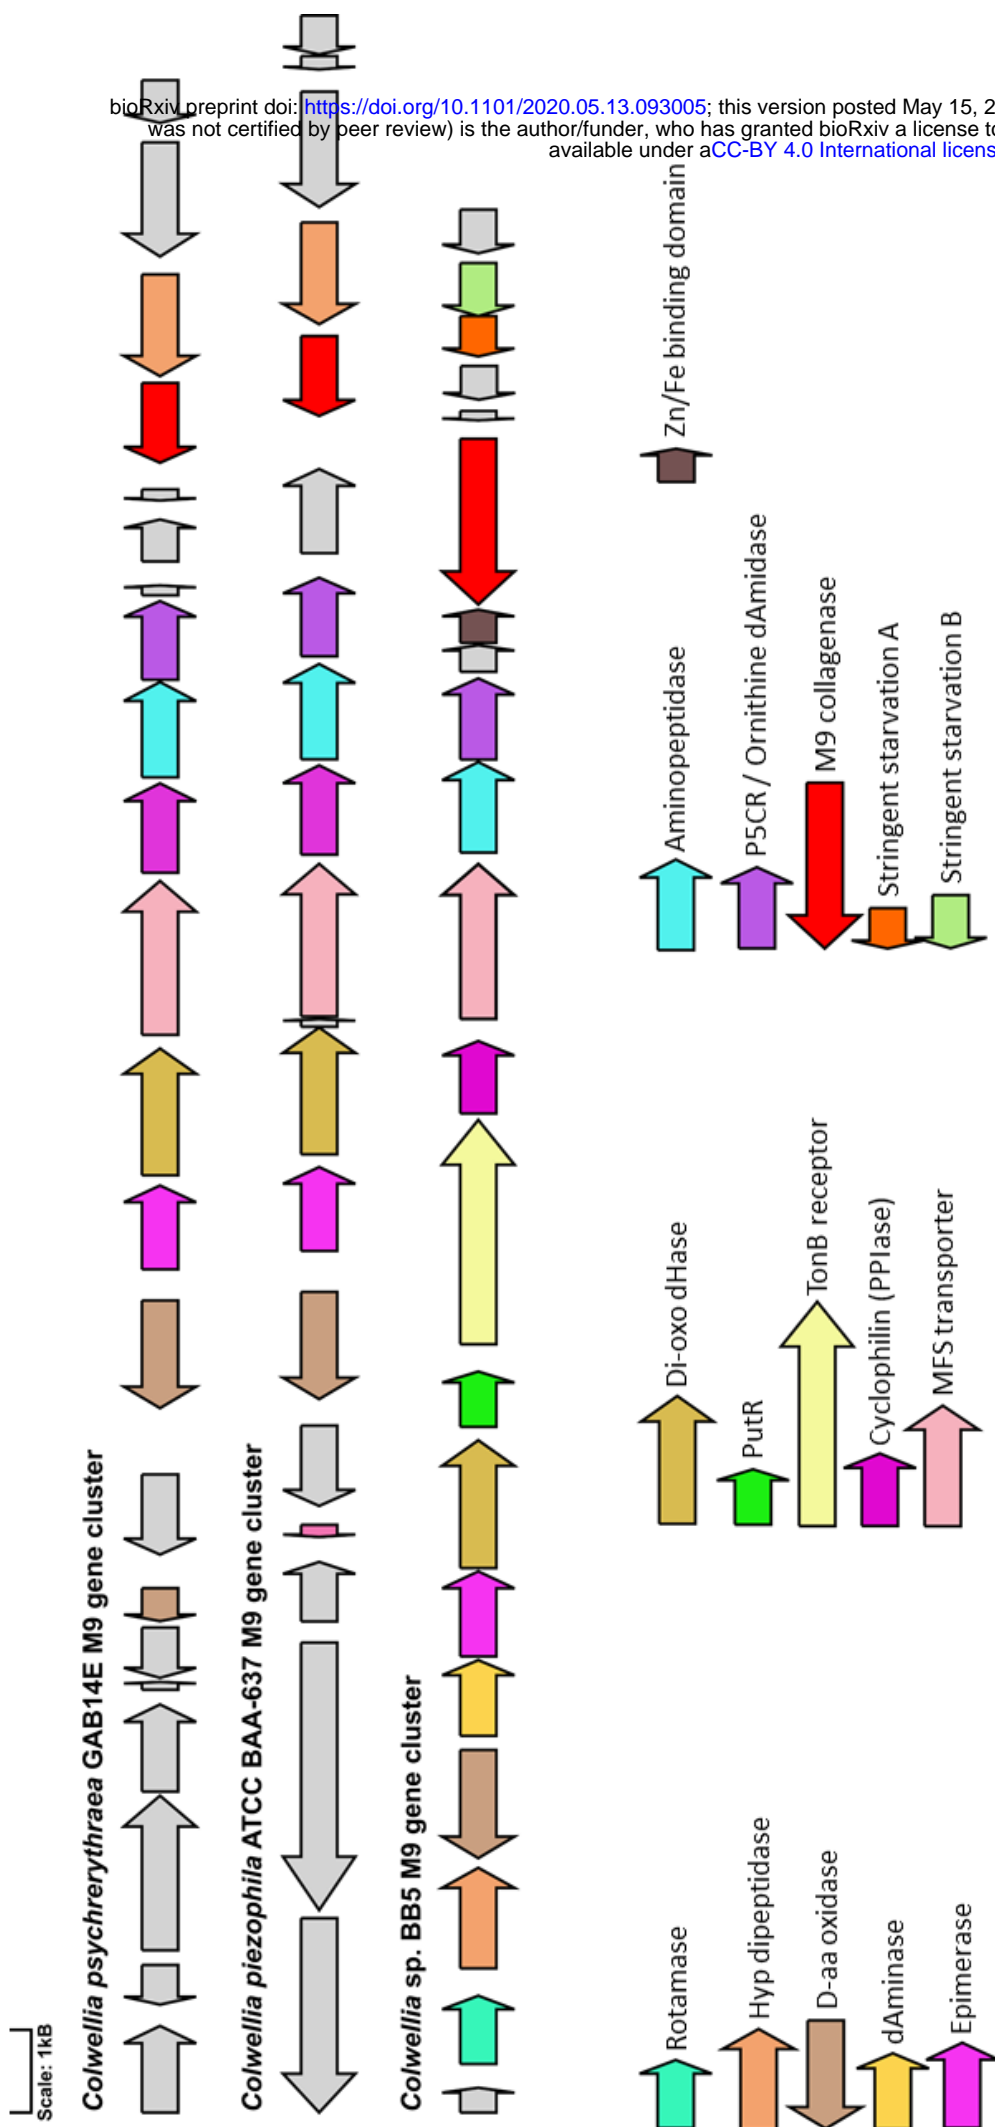

**Figure 6:** Conservation between M9 collagen degradation gene clusters in *Colwellia psychrerythraea* GAB14E, *Colwellia piezophila* ATCC

BAA-637 and the MAG *Colwellia* BB5 drawn at scale. dHase, dehydrogenase; PPIase, peptidyl-prolyl cis trans isomerase; Hyp, D-aa, dAminase

etc. Color coding and gene names are indicated.

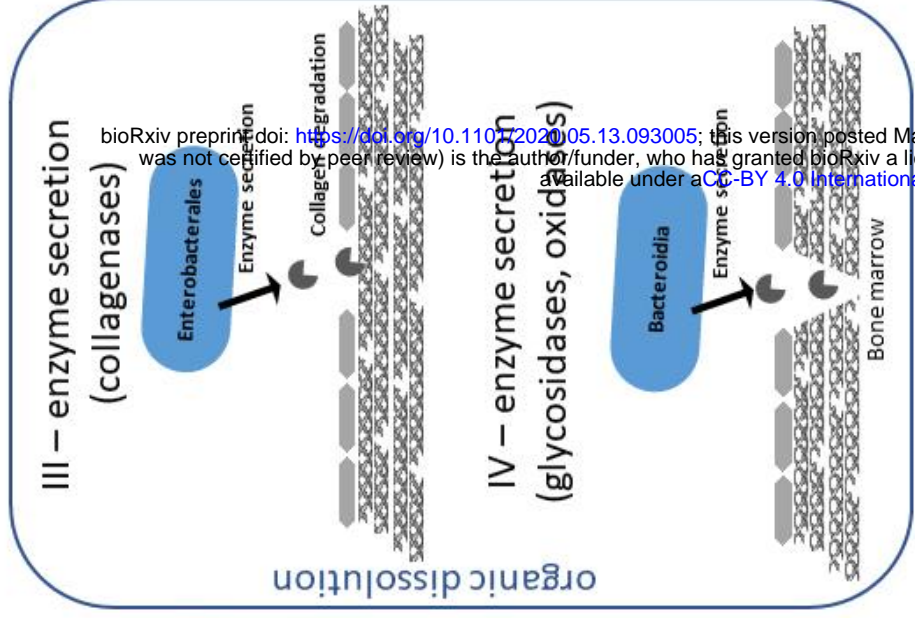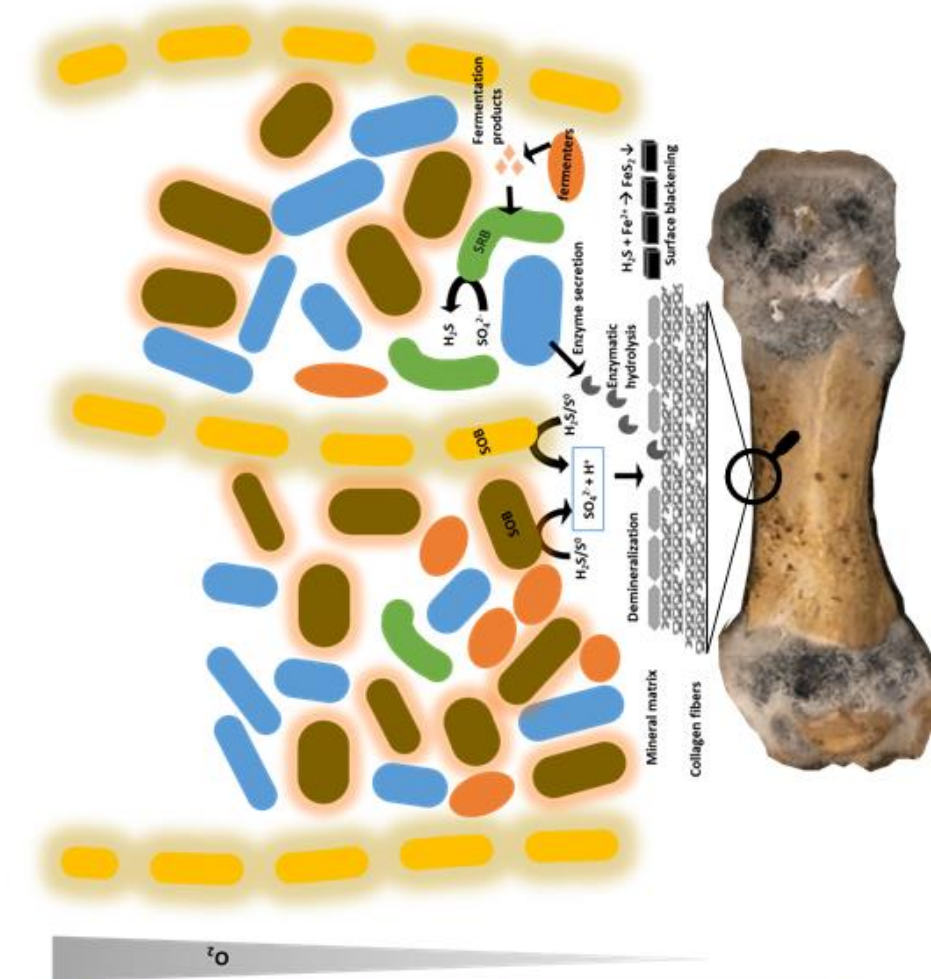

**Figure 7:** Hypothesis of the interplay in the marine bone microbiome and degradome. (I) Sulfur-oxidizing bacteria (SOB, shown with a halo) convert elemental sulfur and  $H_2S$  into sulfate and protons that lead to an acidification and therefore bone demineralization. (II) Sulfate reducing (SRB, green) and sulfur disproportionating bacteria produce  $H_2S$  from sulfate. (III) Enterobacteriales and other especially  $\gamma$ -proteobacteria secrete collagenases to degrade collagen. (IV) Bacteroidia and other bacteria secrete glycosidases and other enzymes to hydrolyze the organic bone components (glycosides, esters, lipids). This exemplifies a bone demineralization loop that fuels itself as long as sulfur is available and degrades the organic bone components in the process.

bioRxiv preprint doi: <https://doi.org/10.1101/2020.05.13.093005>; this version posted May 15, 2021. The copyright holder for this preprint (which was not certified by peer review) is the author/funder, who has granted bioRxiv a license to display the preprint in perpetuity. It is made available under aCC-BY 4.0 International license.
